# Supplementary material for: Potential antihyperlipidemic polyketones from endophytic Diaporthe sp. JC-J7 in Dendrobium nobile
Source: Royal Society of Chemistry journal article supplement (doi:10.1039/c8ra08822e), 2018-01-01
Supplement: c8ra08822e1.pdf [file c8ra08822e1.pdf]

## Supplementary Information

### Potential antihyperlipidemic polyketones from endophytic *Diaporthe* sp. JC-J7 in *Dendrobium nobile*

Ming Hu,<sup>†a</sup> Xue-Qiong Yang,<sup>†a</sup> Chuen-Ping Wan,<sup>b</sup> Bang-Yan Wang,<sup>a</sup> Hai-Yue Yin,<sup>a</sup> Li-Jiao Shi,<sup>a</sup> Ya-Mei Wu,<sup>a</sup> Ya-Bin Yang,<sup>\*a</sup> Hao Zhou<sup>a</sup> and Zhong-Tao Ding<sup>\*a</sup>

- Functional Molecules Analysis and Biotransformation Key Laboratory of Universities in Yunnan Province, Key Laboratory of Medicinal Chemistry for Natural Resource, Ministry of Education, School of Chemical Science and Technology, Yunnan University, Kunming, People's Republic of China, E-mail: ybyang@ynu.edu.cn (Y. B. Yang); ztding@ynu.edu.cn (Z. T. Ding)
- Affiliated Hospital of Yunnan University of Traditional Chinese Medicine, Kunming 650021, PR China

**Abstract** Eleven new polyketones named diaporthsins A-K (**1-11**) were isolated from the fermentation of *Diaporthe* sp. JC-J7. The chemical structures of compounds (**1-11**) were elucidated by spectroscopic method, including HRESIMS, 2DNMR, NMR spectra and chemical method. Compound **11** features unusual acyclic polyketone-phenolic polyketone hybrid structure that integrate the characteristics of different fungal metabolites (cytosporone and multiplolide). Compound **3** was the only C<sub>12</sub>-polyketone in this research. These new polyketones showed inhibitory activity on content of triglycerides (TG) in steatosis hepatocyte L-02 cells. Among them, compound **5**, and (4E)-6,7,9- trihydroxydec-4-enoic acid display inhibitory activity on content of triglycerides (TG) in steatotic L-02 cells with inhibition ratios of 26%, and 21% at concentration of 5 µg/mL, along with inhibition ratios of 8-O-acetylmultiplolide A, and phomopsisporone A at concentration of 5 µg/mL were calculated to be about 24 %, and 16 % respectively, which was equivalent to the antihyperlipidemic activity of lovastatin. The preliminary structure–activity relationship stated that the acetyl at C-8 can increase the antihyperlipidemic activity of multiplolide A, and the glycol ester and hydroxyl at C-6 can also raise the corresponding activity of diaporthsin B.

## Table of contents

|                                                                                                   |    |
|---------------------------------------------------------------------------------------------------|----|
| Figure S1. <sup>1</sup> H NMR spectrum of compound <b>1</b> in CDCl <sub>3</sub> (600 MHz)        | 4  |
| Figure S2. <sup>13</sup> C NMR spectrum of compound <b>1</b> in CDCl <sub>3</sub> (150 MHz)       | 4  |
| Figure S3. COSY spectrum of compound <b>1</b> in CDCl <sub>3</sub>                                | 5  |
| Figure S4. HSQC spectrum of compound <b>1</b> in CDCl <sub>3</sub> (600 MHz)                      | 5  |
| Figure S5. ROESY spectrum of compound <b>1</b> in CDCl <sub>3</sub>                               | 6  |
| Figure S6. HMBC spectrum of compound <b>1</b> in CDCl <sub>3</sub>                                | 6  |
| Figure S7. HRESIMS spectrum of compound <b>1</b>                                                  | 7  |
| Figure S8. IR Spectrum of compound <b>1</b>                                                       | 7  |
| Figure S9. <sup>1</sup> H NMR spectrum of compound <b>2</b> in MeOD (600 MHz)                     | 8  |
| Figure S10. <sup>13</sup> C NMR spectrum of compound <b>2</b> in MeOD (150 MHz)                   | 8  |
| Figure S11. COSY spectrum of compound <b>2</b> in MeOD                                            | 9  |
| Figure S12. HSQC spectrum of compound <b>2</b> in MeOD                                            | 9  |
| Figure S13. ROESY spectrum of compound <b>2</b> in MeOD                                           | 10 |
| Figure S14. HMBC spectrum of compound <b>2</b> in MeOD                                            | 10 |
| Figure S15. HRESIMS spectrum of compound <b>2</b>                                                 | 11 |
| Figure S16. IR Spectrum of compound <b>2</b>                                                      | 11 |
| Figure S17. <sup>1</sup> H NMR spectrum of compound <b>3</b> in MeOD (600 MHz)                    | 12 |
| Figure S18. <sup>13</sup> C NMR spectrum of compound <b>3</b> in MeOD (150 MHz)                   | 12 |
| Figure S19. COSY spectrum of compound <b>3</b> in MeOD                                            | 13 |
| Figure S20. HSQC spectrum of compound <b>3</b> in MeOD                                            | 13 |
| Figure S21. ROESY spectrum of compound <b>3</b> in MeOD                                           | 14 |
| Figure S22. HMBC spectrum of compound <b>3</b> in MeOD                                            | 14 |
| Figure S23. HRESIMS spectrum of compound <b>3</b>                                                 | 15 |
| Figure S24. IR Spectrum of compound <b>3</b>                                                      | 15 |
| Figure S25. <sup>1</sup> H NMR spectrum of compound <b>4</b> in MeOD (500 MHz)                    | 16 |
| Figure S26. <sup>13</sup> C NMR spectrum of compound <b>4</b> in MeOD (125 MHz)                   | 16 |
| Figure S27. COSY spectrum of compound <b>4</b> in MeOD                                            | 17 |
| Figure S28. HSQC spectrum of compound <b>4</b> in MeOD                                            | 17 |
| Figure S29. NOESY spectrum of compound <b>4</b> in MeOD                                           | 18 |
| Figure S30. HMBC spectrum of compound <b>4</b> in MeOD                                            | 18 |
| Figure S31. HRESIMS spectrum of compound <b>4</b>                                                 | 19 |
| Figure S32. IR Spectrum of compound <b>4</b>                                                      | 19 |
| Figure S33. <sup>1</sup> H NMR spectrum of compound <b>5</b> in MeOD (500 MHz)                    | 20 |
| Figure S34. <sup>13</sup> C NMR spectrum of compound <b>5</b> in MeOD (125 MHz)                   | 20 |
| Figure S35. COSY spectrum of compound <b>5</b>                                                    | 21 |
| Figure S36. HSQC spectrum of compound <b>5</b>                                                    | 21 |
| Figure S37. NOESY spectrum of compound <b>5</b>                                                   | 22 |
| Figure S38. HMBC spectrum of compound <b>5</b>                                                    | 22 |
| Figure S39. HRESIMS spectrum of compound <b>5</b>                                                 | 23 |
| Figure S40. IR Spectrum of compound <b>5</b>                                                      | 23 |
| Figure S41. <sup>1</sup> H NMR spectrum of compound <b>6</b> MeOD (500 MHz)                       | 24 |
| Figure S42. <sup>13</sup> C NMR spectrum of compound <b>6</b> in MeOD (125 MHz)                   | 24 |
| Figure S43. COSY spectrum of compound <b>6</b> in MeOD                                            | 25 |
| Figure S44. HSQC spectrum of compound <b>6</b> in MeOD                                            | 25 |
| Figure S45. NOESY spectrum of compound <b>6</b> in MeOD                                           | 26 |
| Figure S46. HMBC spectrum of compound <b>6</b> in MeOD                                            | 26 |
| Figure S47. HRESIMS spectrum of compound <b>6</b>                                                 | 27 |
| Figure S48. IR Spectrum of compound <b>6</b>                                                      | 27 |
| Figure S49. <sup>1</sup> H NMR spectrum of compound <b>7</b> in acetone-d <sub>6</sub> (500 MHz)  | 28 |
| Figure S50. <sup>13</sup> C NMR spectrum of compound <b>7</b> in acetone-d <sub>6</sub> (125 MHz) | 28 |
| Figure S51. COSY spectrum of compound <b>7</b> in acetone-d <sub>6</sub>                          | 29 |
| Figure S52. HSQC spectrum of compound <b>7</b> in acetone-d <sub>6</sub>                          | 29 |
| Figure S53. NOESY spectrum of compound <b>7</b> in acetone-d <sub>6</sub>                         | 30 |
| Figure S54. HMBC spectrum of compound <b>7</b> in acetone-d <sub>6</sub>                          | 30 |
| Figure S55. HRESIMS spectrum of compound <b>7</b>                                                 | 31 |
| Figure S56. IR Spectrum of compound <b>7</b>                                                      | 31 |
| Figure S57. <sup>1</sup> H NMR spectrum of compound <b>8</b> in MeOD (600 MHz)                    | 32 |
| Figure S58. <sup>13</sup> C NMR spectrum of compound <b>8</b> in MeOD (150 MHz)                   | 32 |
| Figure S59. COSY spectrum of compound <b>8</b> in MeOD                                            | 33 |
| Figure S60. HSQC spectrum of compound <b>8</b> in MeOD                                            | 33 |
| Figure S61. NOESY spectrum of compound <b>8</b> in MeOD                                           | 34 |
| Figure S62. HMBC spectrum of compound <b>8</b> in MeOD                                            | 34 |
| Figure S63. HRESIMS spectrum of compound <b>8</b>                                                 | 35 |
| Figure S64. IR Spectrum of compound <b>8</b>                                                      | 35 |
| Figure S65. <sup>1</sup> H NMR spectrum of compound <b>9</b> in CHCl <sub>3</sub> (600 MHz)       | 36 |
| Figure S66. <sup>13</sup> C NMR spectrum of compound <b>9</b> in CHCl <sub>3</sub> (150 MHz)      | 36 |
| Figure S67. COSY spectrum of compound <b>9</b> in CHCl <sub>3</sub>                               | 37 |

|                                                                                                    |    |
|----------------------------------------------------------------------------------------------------|----|
| Figure S68. HSQC spectrum of compound <b>9</b> in CHCl <sub>3</sub>                                | 37 |
| Figure S69. ROESY spectrum of compound <b>9</b> in CHCl <sub>3</sub>                               | 38 |
| Figure S70. HMBC spectrum of compound <b>9</b> in CHCl <sub>3</sub>                                | 38 |
| Figure S71. HRESIMS spectrum of compound <b>9</b>                                                  | 39 |
| Figure S72. IR Spectrum of compound <b>9</b>                                                       | 39 |
| Figure S73. <sup>1</sup> H NMR spectrum of compound <b>10</b> in acetone-d <sub>6</sub> (600 MHz)  | 40 |
| Figure S74. <sup>13</sup> C NMR spectrum of compound <b>10</b> in acetone-d <sub>6</sub> (150 MHz) | 40 |
| Figure S75. COSY spectrum of compound <b>10</b> in acetone-d <sub>6</sub>                          | 41 |
| Figure S76. HSQC spectrum of compound <b>10</b> in acetone-d <sub>6</sub>                          | 41 |
| Figure S77. NOESY spectrum of compound <b>10</b> in acetone-d <sub>6</sub>                         | 42 |
| Figure S78. HMBC spectrum of compound <b>10</b> in acetone-d <sub>6</sub>                          | 42 |
| Figure S79. HRESIMS spectrum of compound <b>10</b>                                                 | 43 |
| Figure S80. IR Spectrum of compound <b>10</b>                                                      | 43 |
| Figure S81. <sup>1</sup> H NMR spectrum of compound <b>11</b> in MeOD (500 MHz)                    | 44 |
| Figure S82. <sup>13</sup> C NMR spectrum of compound <b>11</b> in MeOD (125 MHz)                   | 44 |
| Figure S83. COSY spectrum of compound <b>11</b> in MeOD                                            | 45 |
| Figure S84. HSQC spectrum of compound <b>11</b> in MeOD                                            | 45 |
| Figure S85. NOESY spectrum of compound <b>11</b> in MeOD                                           | 46 |
| Figure S86. HMBC spectrum of compound <b>11</b> in MeOD                                            | 46 |
| Figure S87. HRESIMS spectrum of compound <b>11</b>                                                 | 47 |
| Figure S88. IR Spectrum of compound <b>11</b>                                                      | 47 |
| Figure S89. UV Spectrum of compound <b>11</b>                                                      | 48 |
| Figure S90. <sup>1</sup> H NMR spectrum of (S)-MTPA ester of <b>1</b> in CDCl <sub>3</sub>         | 48 |
| Figure S91. <sup>1</sup> H NMR spectrum of (R)-MTPA ester of <b>1</b> in CDCl <sub>3</sub>         | 48 |

pdata/1 — YUNNAN UNIVERSITY ASCEND AV111HD600 DSHM-48 — Jan09-2018-huming — PROTON CDCl3 (D:\dingzhongtao) huming 2

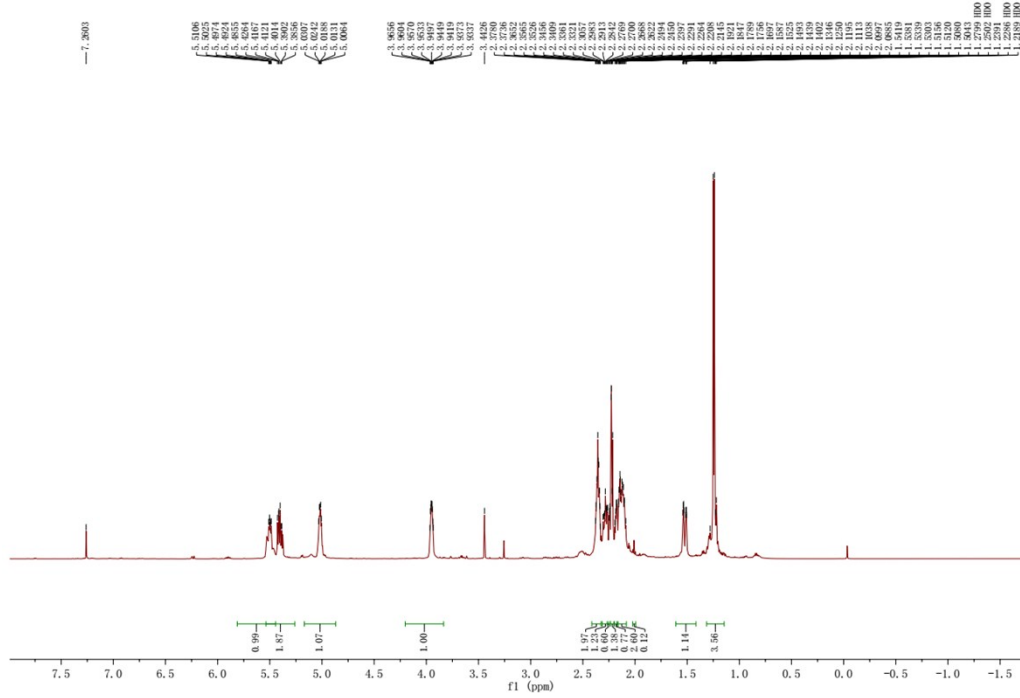

Figure S1.  $^1\text{H}$  NMR of compound **1** in  $\text{CDCl}_3$

pdata/1  
YUNNAN UNIVERSITY ASCEND AV111HD600 DSHM-48  
Jan09-2018-huming  
C13DEPT90 CDCl3 (D:\dingzhongtao) huming 2

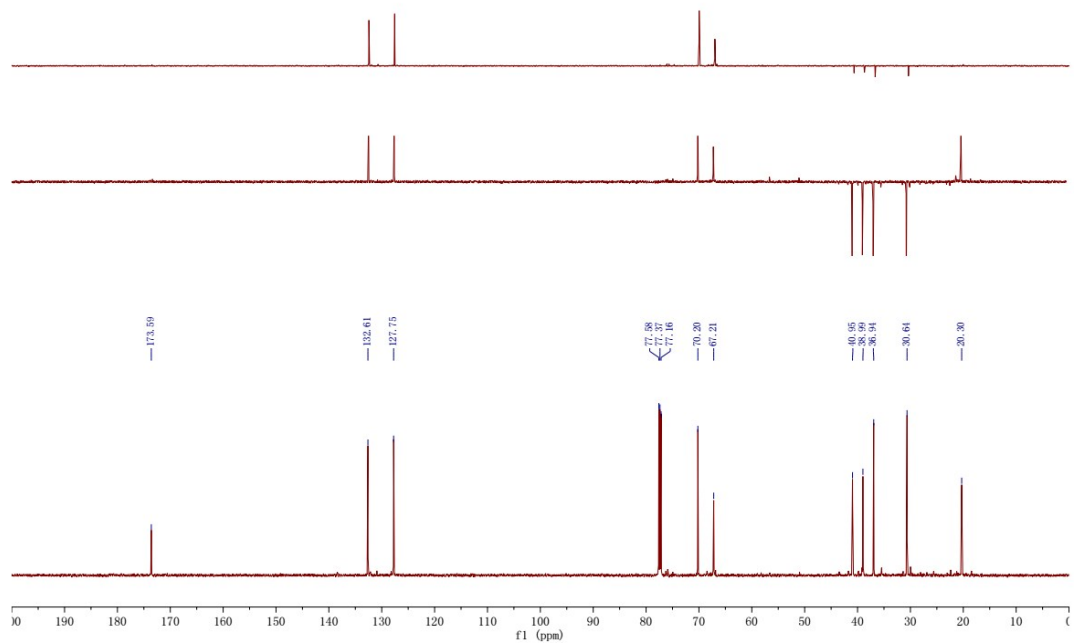

Figure S2.  $^{13}\text{C}$  NMR of compound **1** in  $\text{CDCl}_3$

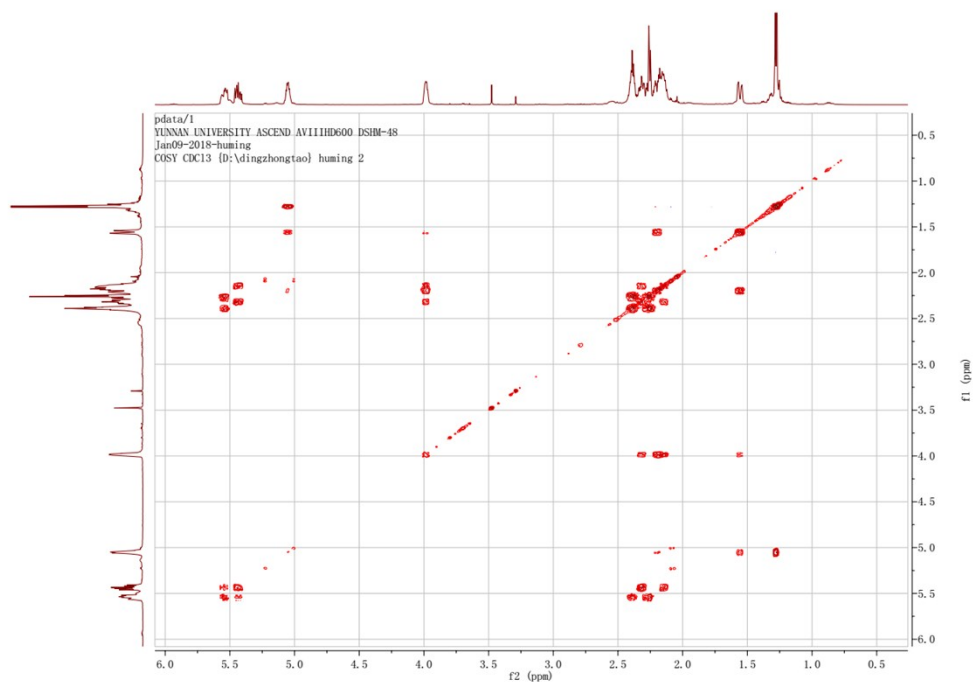

Figure S3.  $^1\text{H}$ - $^1\text{H}$  COSY spectrum of compound **1** in  $\text{CDCl}_3$

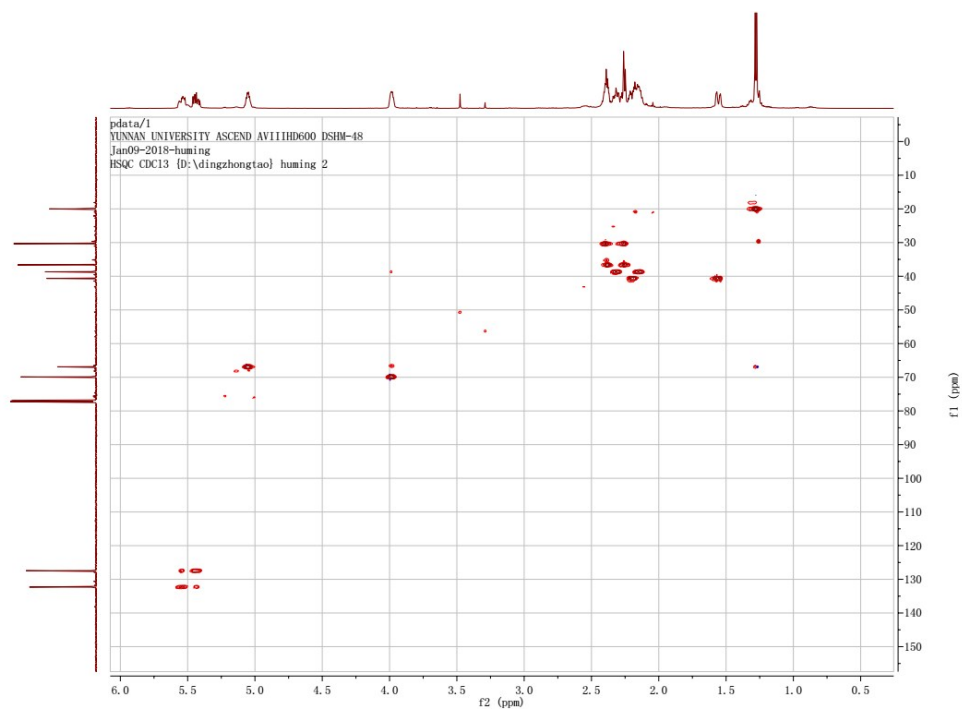

Figure S4. HSQC spectrum of compound **1** in  $\text{CDCl}_3$

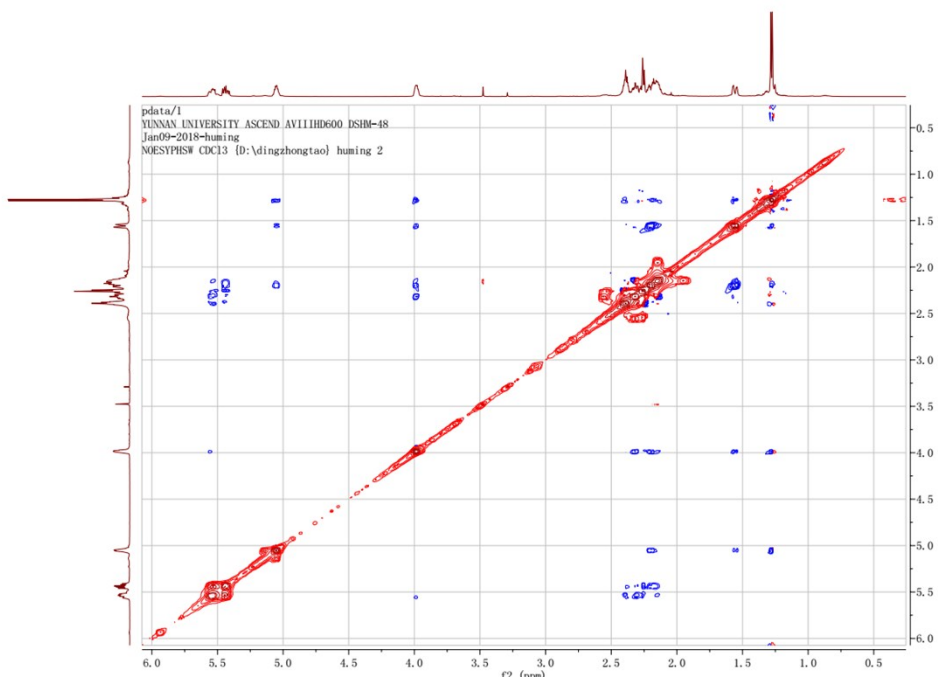

Figure S5. NOESY spectrum of compound **1** in CDCl<sub>3</sub>

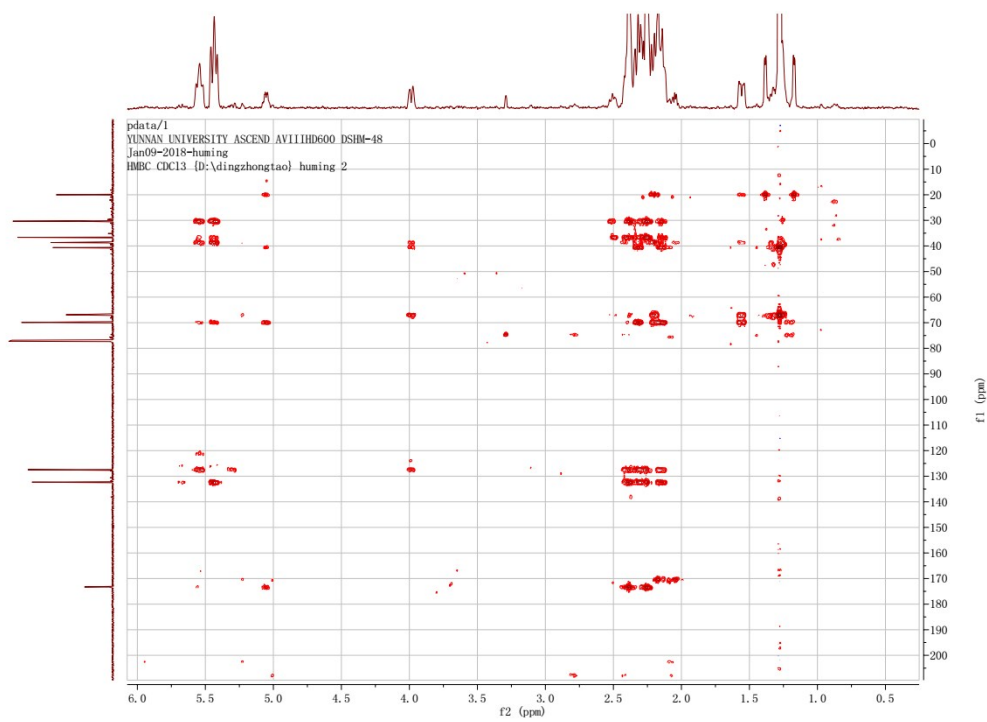

Figure S6. HMBC spectrum of compound **1** in CDCl<sub>3</sub>

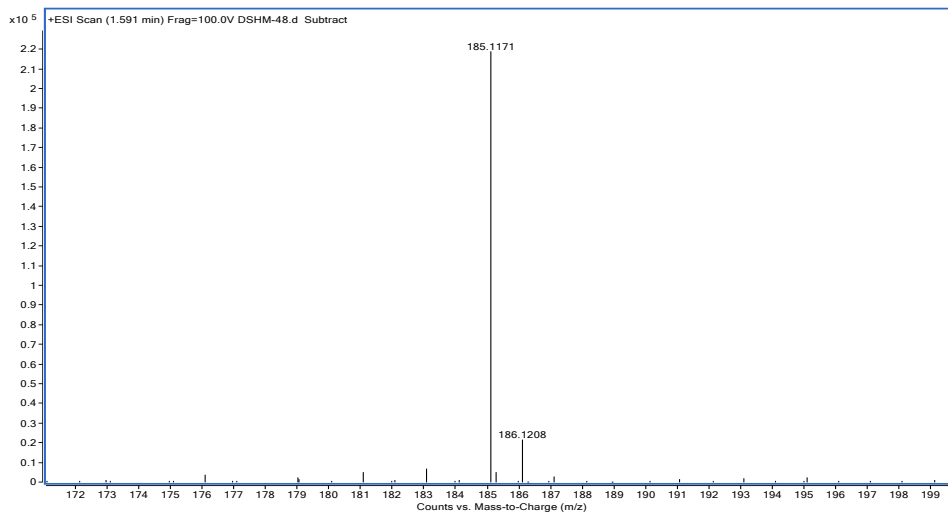

Figure S7. HRESIMS spectrum of compound **1**

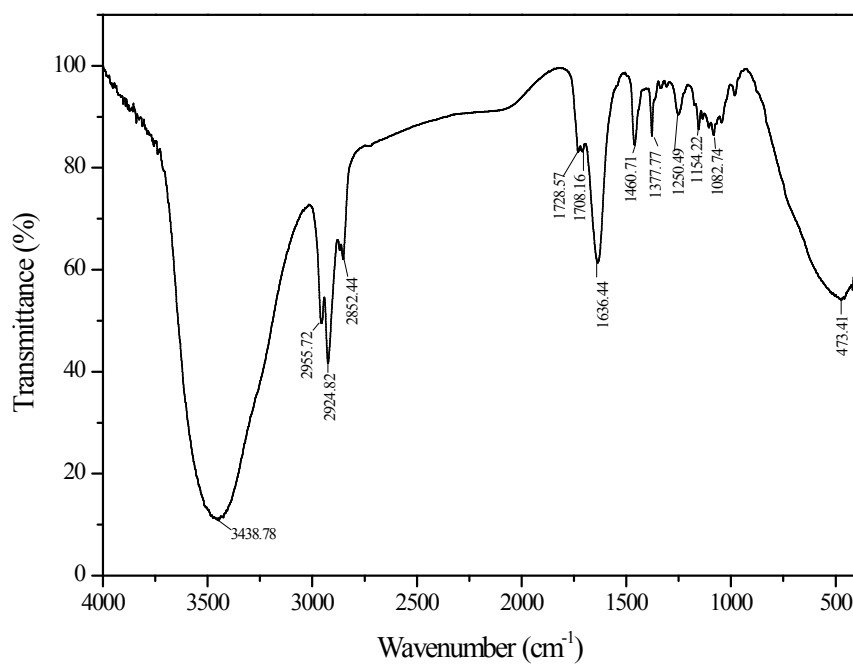

Figure S8. IR Spectrum of compound **1**

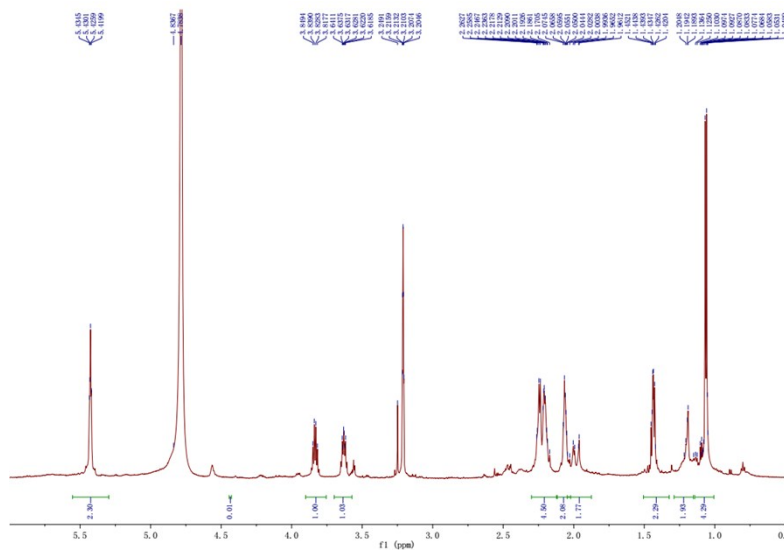

Figure S9.  $^1\text{H}$  NMR of compound **2** in MeOD

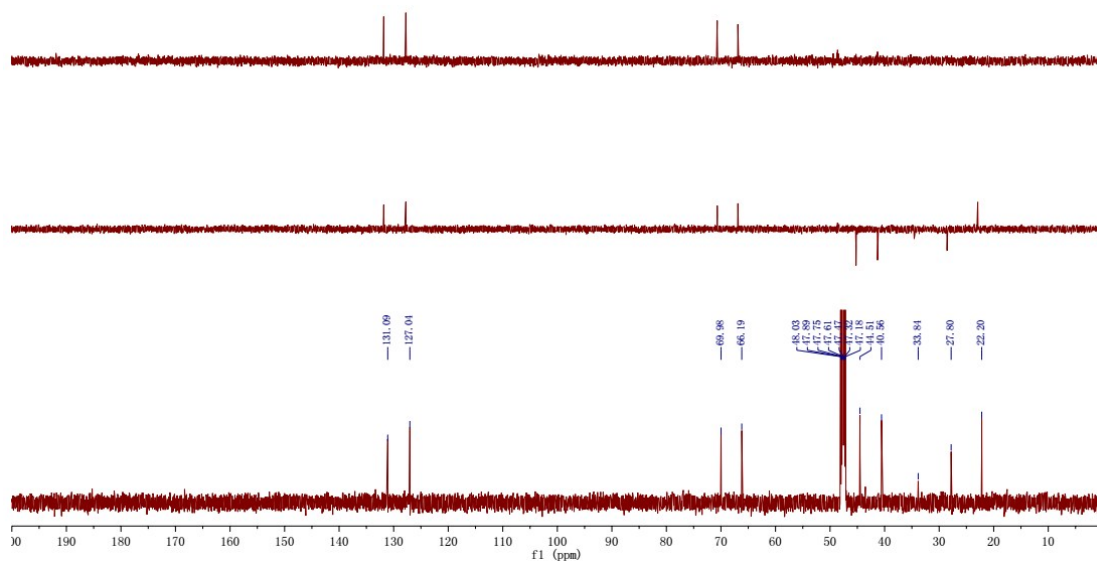

Figure S10.  $^{13}\text{C}$  NMR of compound **2** in MeOD



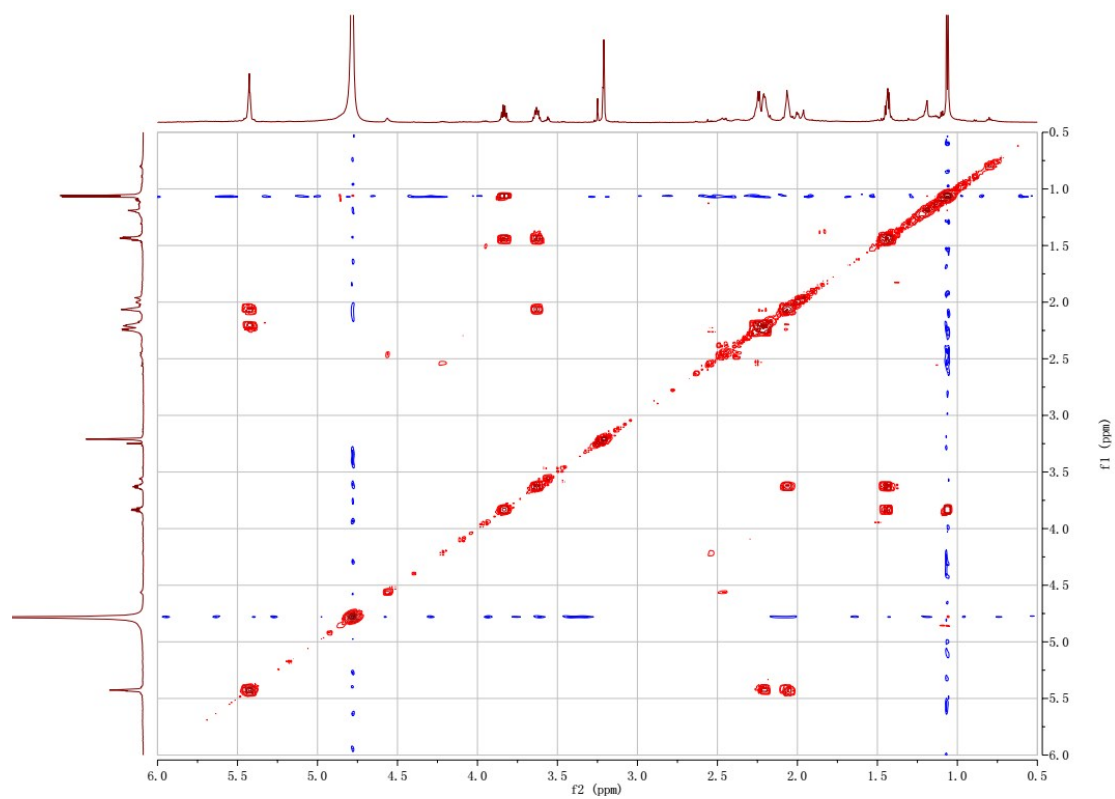

Figure S11.  $^1\text{H}$ - $^1\text{H}$  COSY spectrum of compound **2** in MeOD

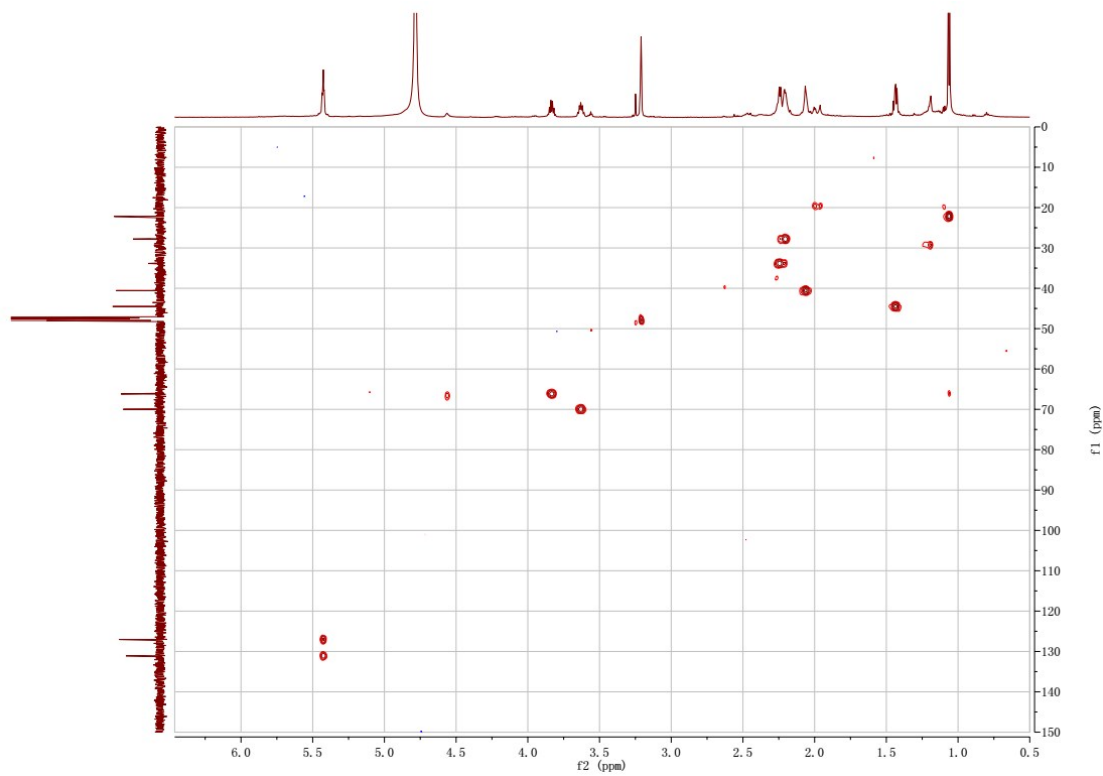

Figure S12. HSQC spectrum of compound **2** in MeOD

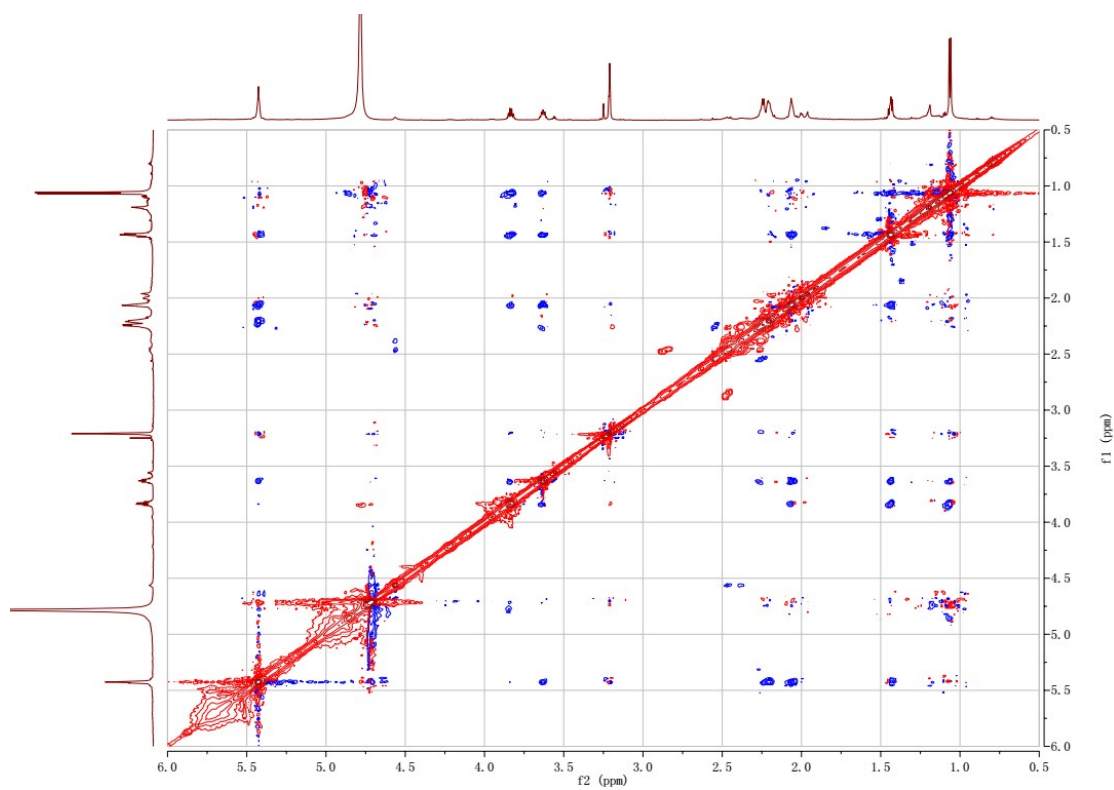

Figure S13. NOESY spectrum of compound **2** in MeOD

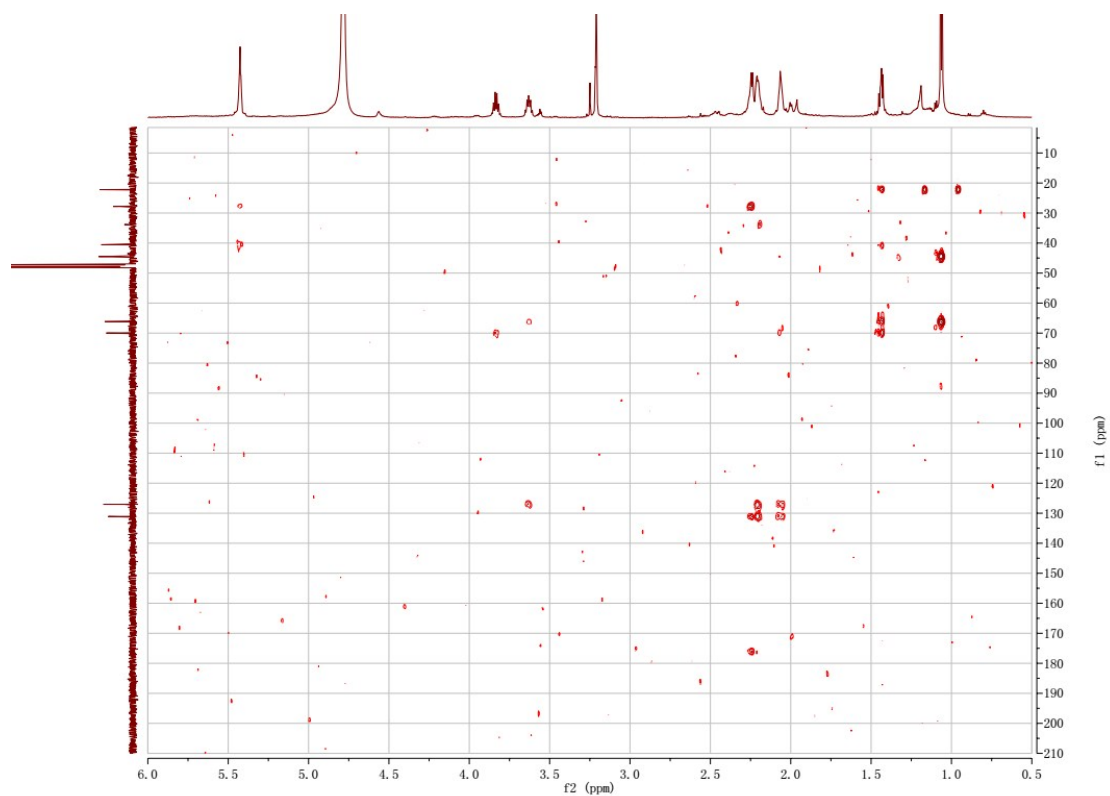

Figure S14. HMBC spectrum of compound **2** in MeOD

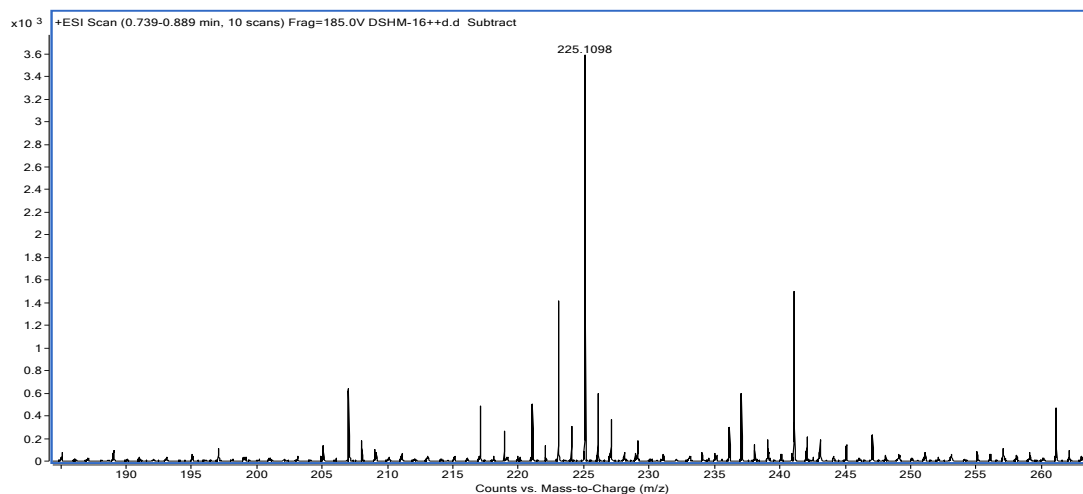

Figure S15. HRESIMS spectrum of compound **2**

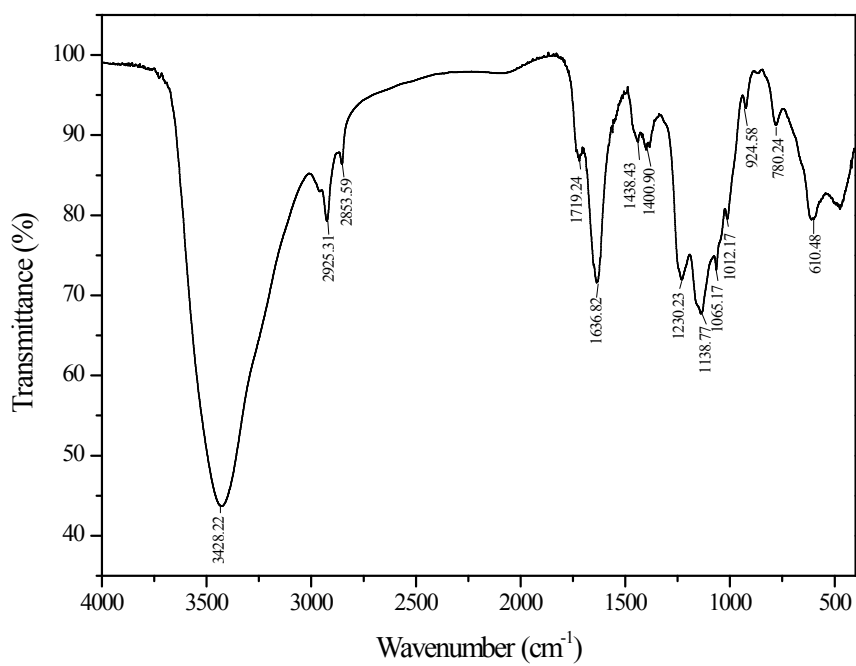

Figure S16. IR Spectrum of compound **2**



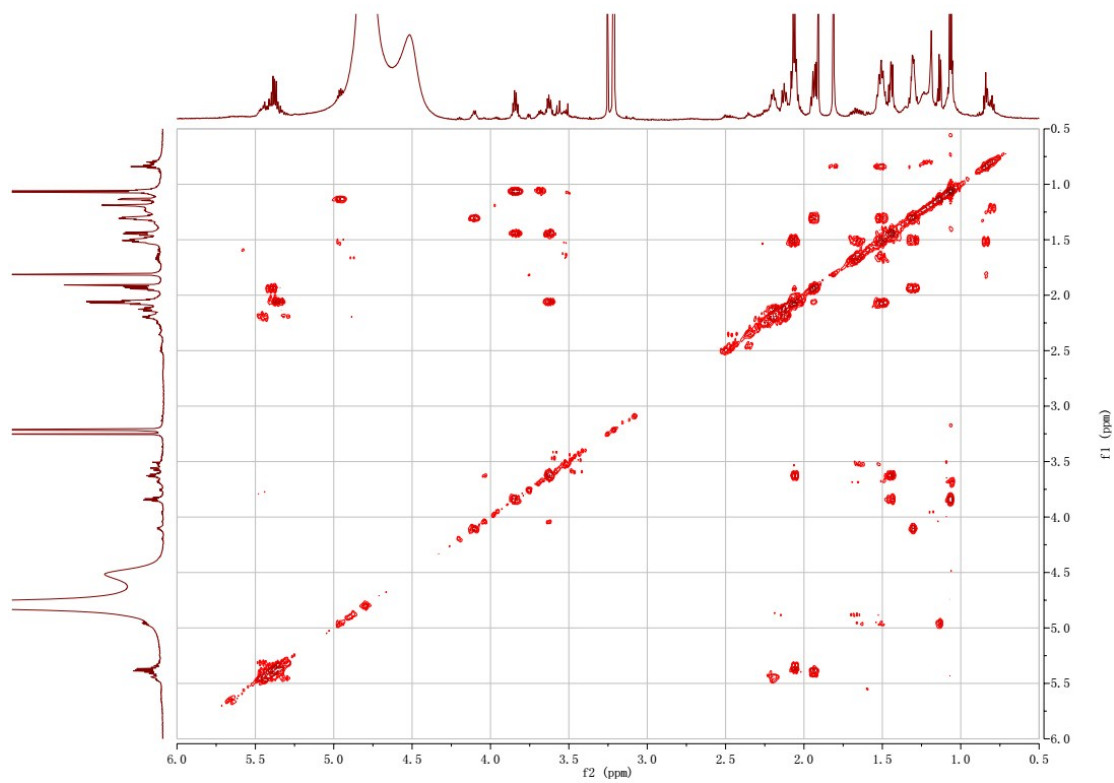

Figure S19.  $^1\text{H}$ - $^1\text{H}$  COSY spectrum of compound **3** in MeOD

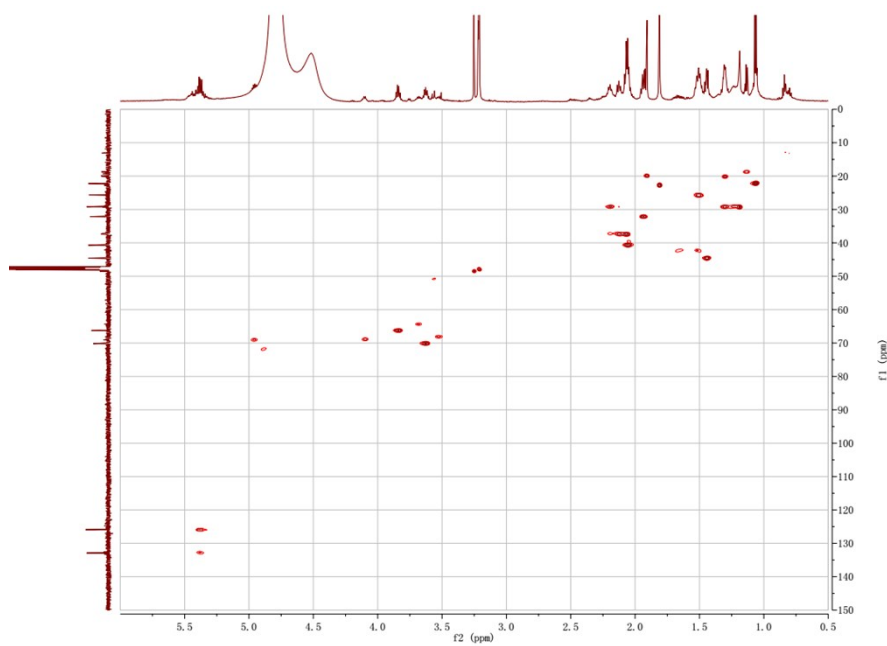

Figure S20. HSQC spectrum of compound **3** in MeOD

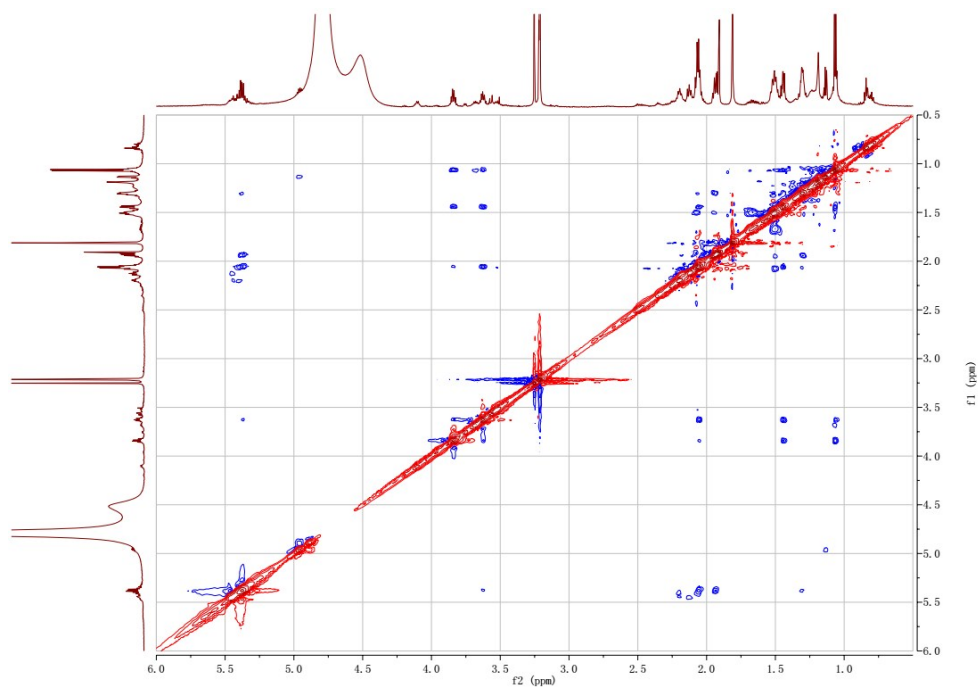

Figure S21. NOESY spectrum of compound **3** in MeOD

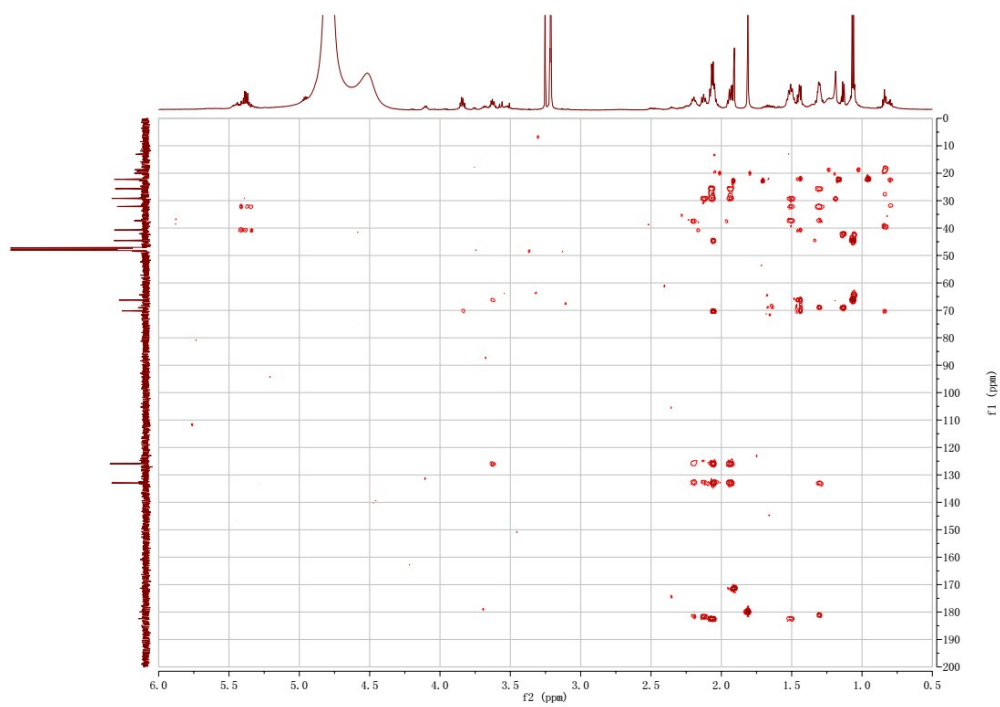

Figure S22. HMBC spectrum of compound **3** in MeOD

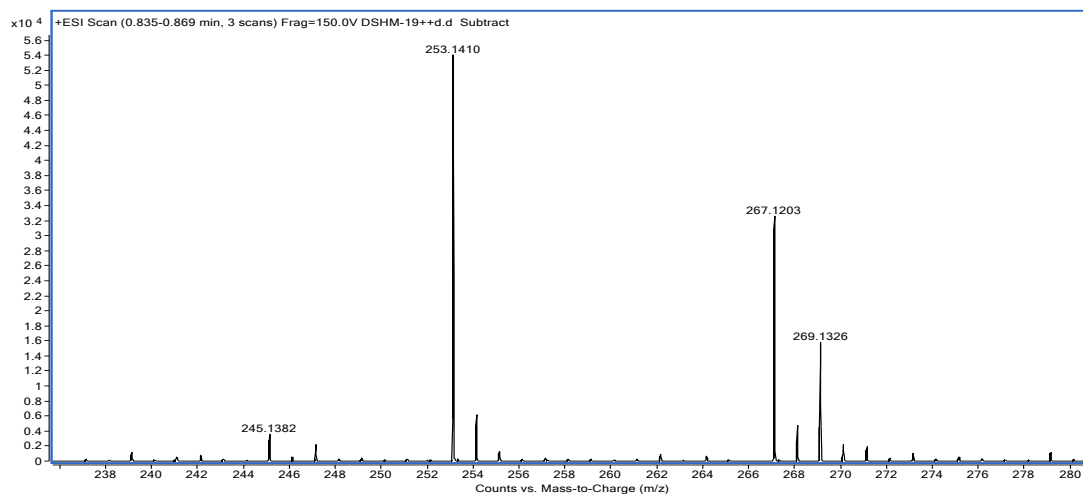

Figure S23. HRESIMS spectrum of compound 3

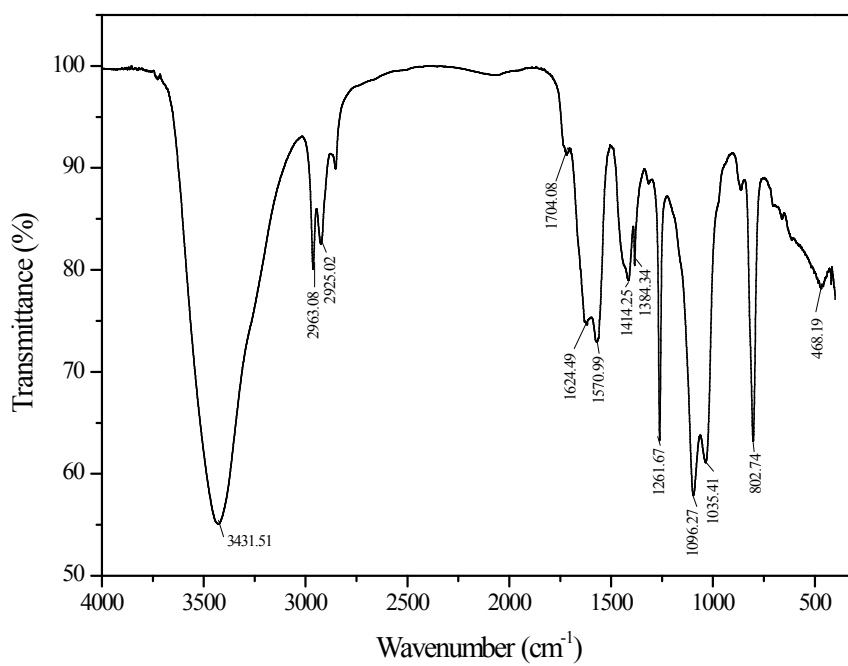

Figure S24. IR Spectrum of compound 3

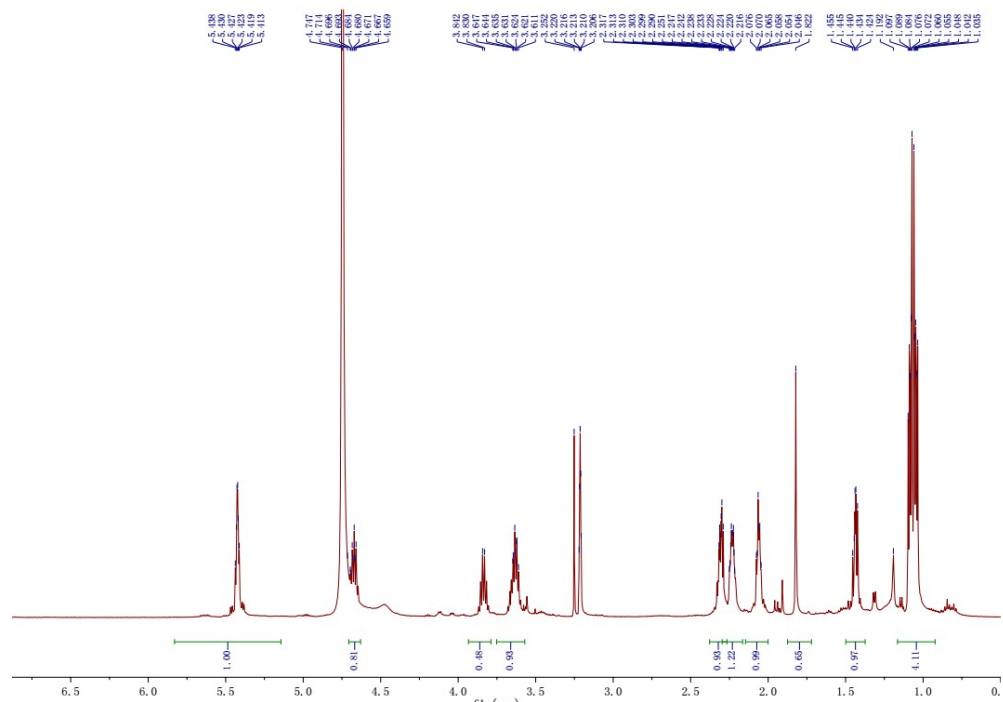

Figure S25.  $^1\text{H}$  NMR of compound **4** in MeOD

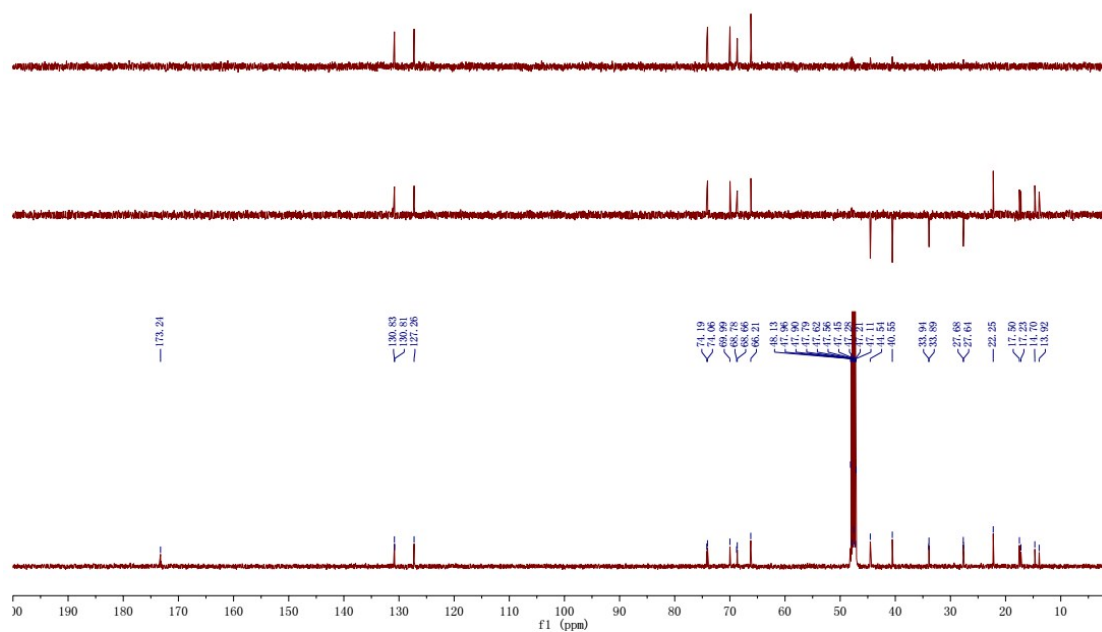

Figure S26.  $^{13}\text{C}$  NMR of compound **4** in MeOD



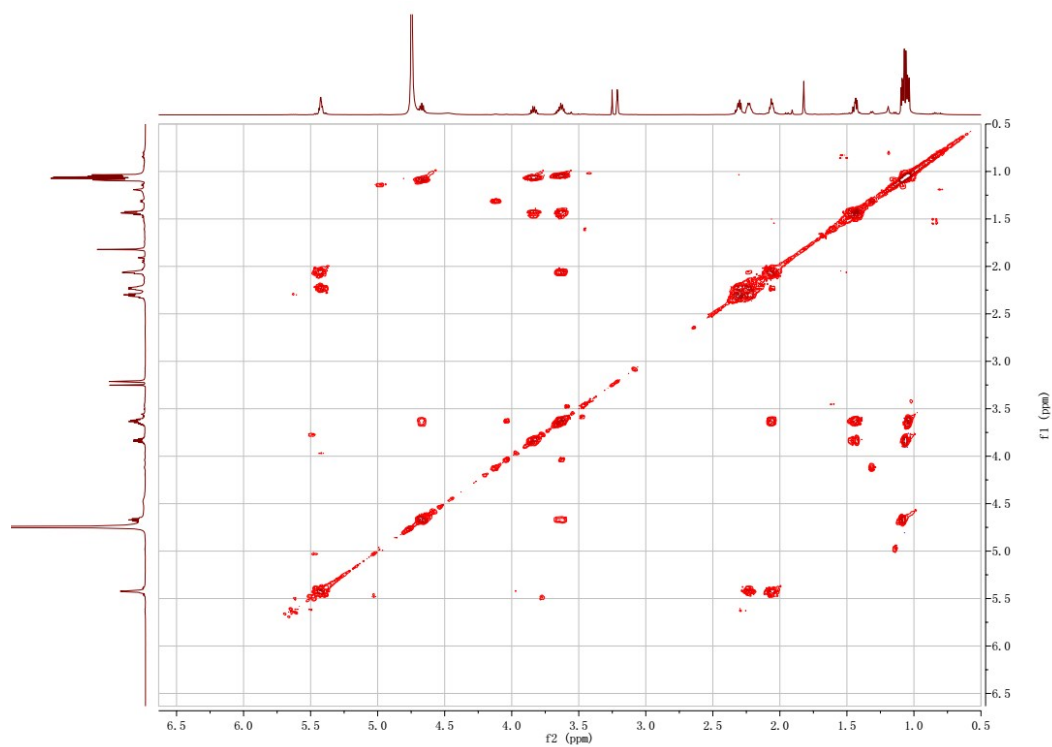

Figure S27.  $^1\text{H}$ - $^1\text{H}$  COSY spectrum of compound **4** in MeOD

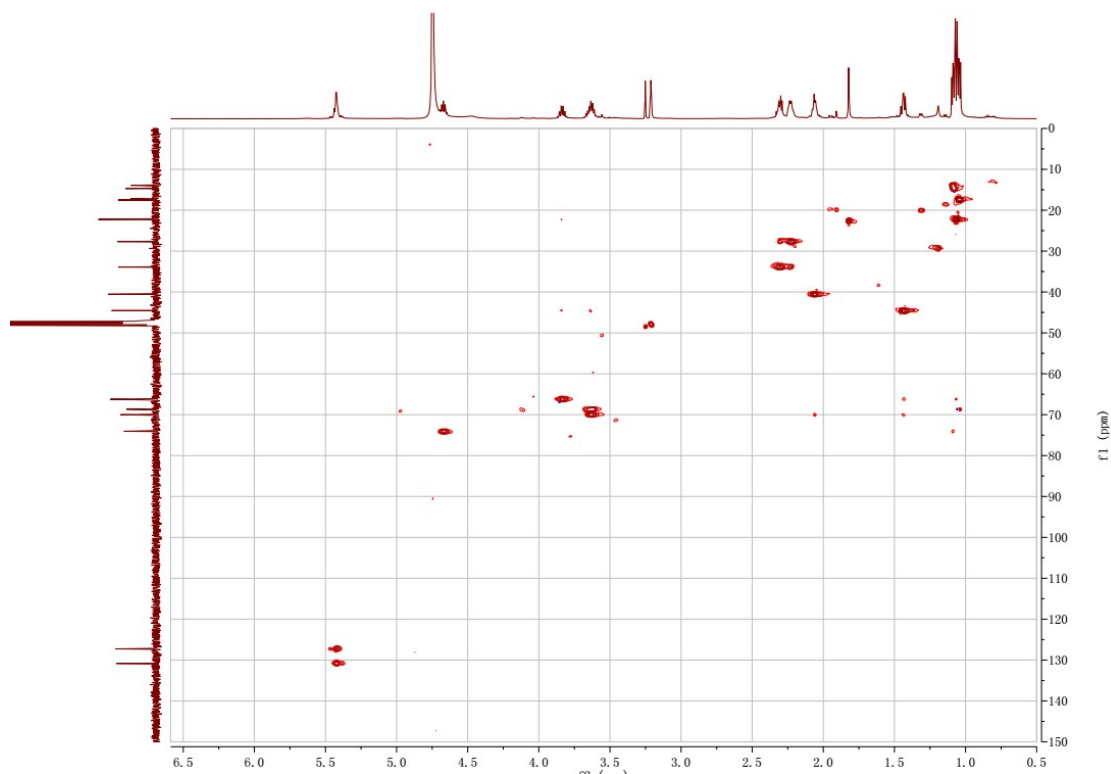

Figure S28. HSQC spectrum of compound **4** in MeOD

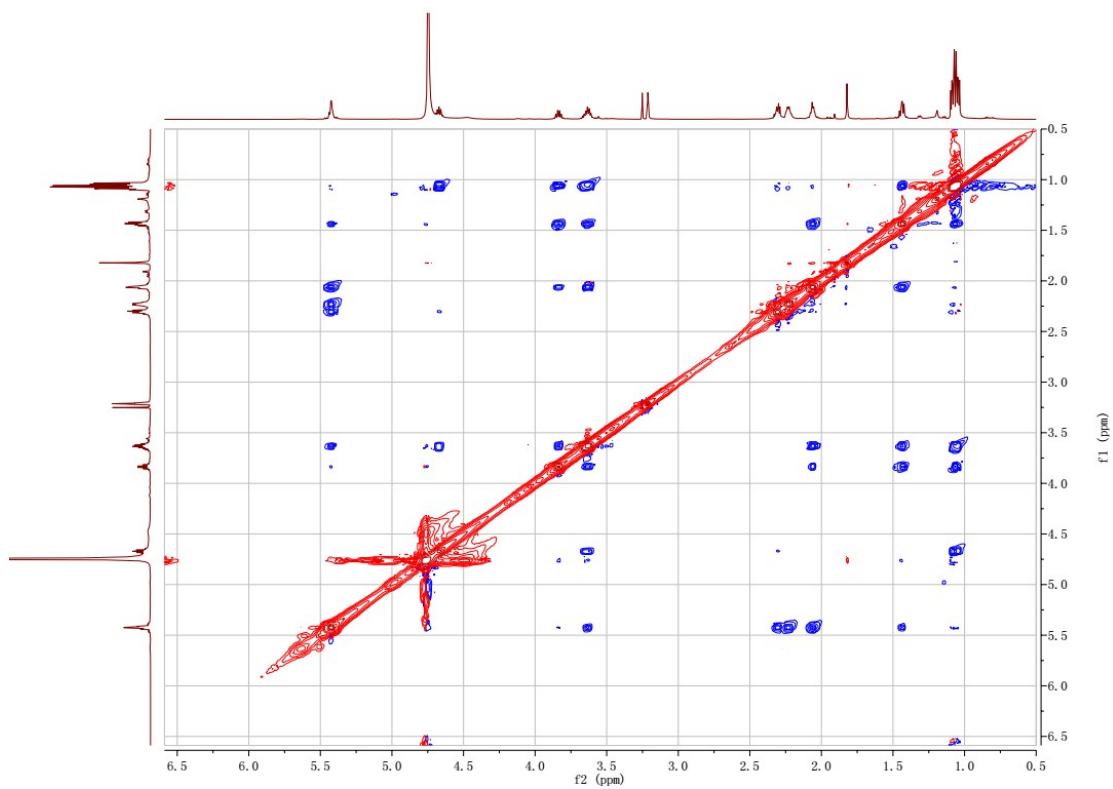

Figure S29. NOESY spectrum of compound **4** in MeOD

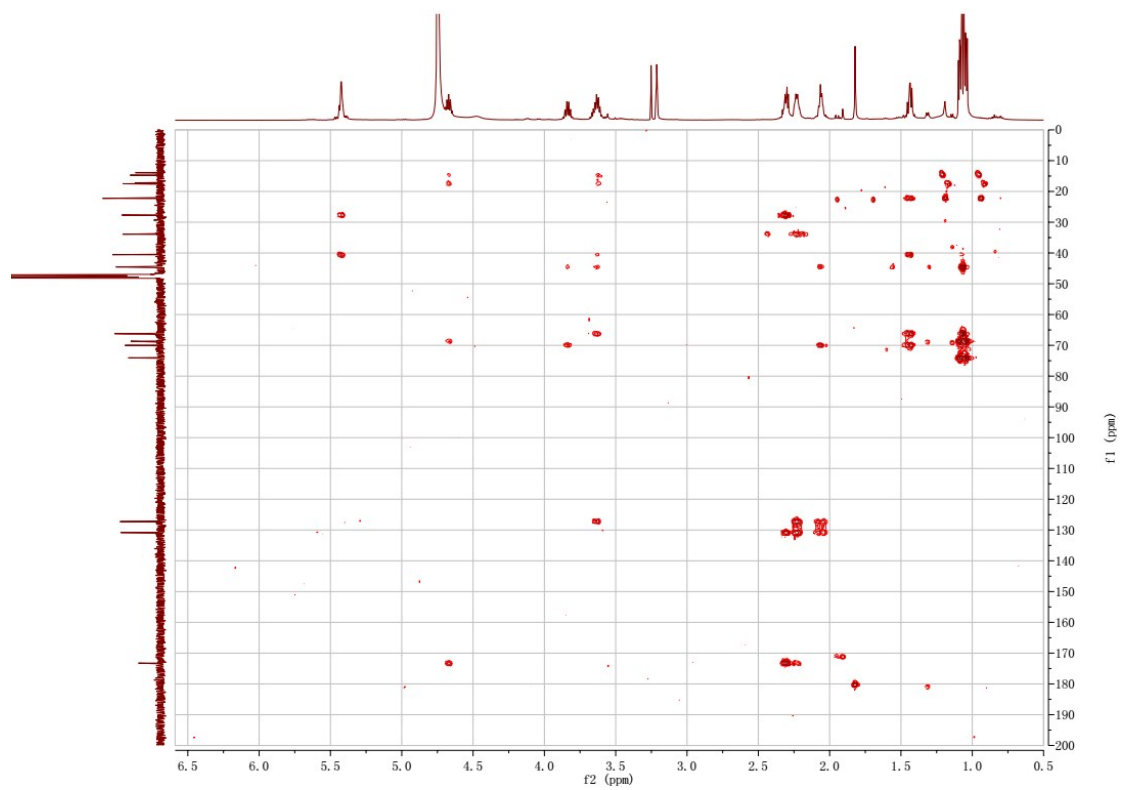

Figure S30. HMBC spectrum of compound **4** in MeOD

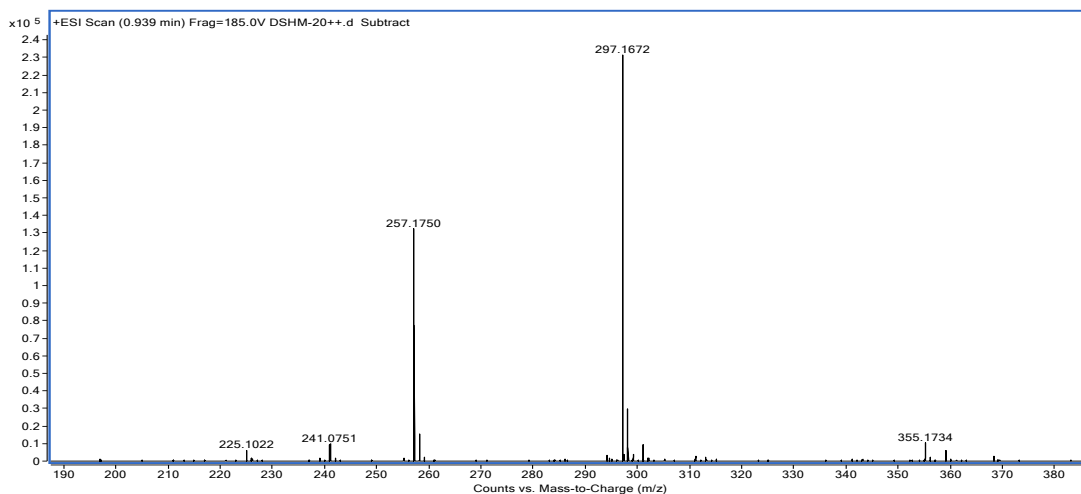

Figure S31. HRESIMS spectrum of compound 4

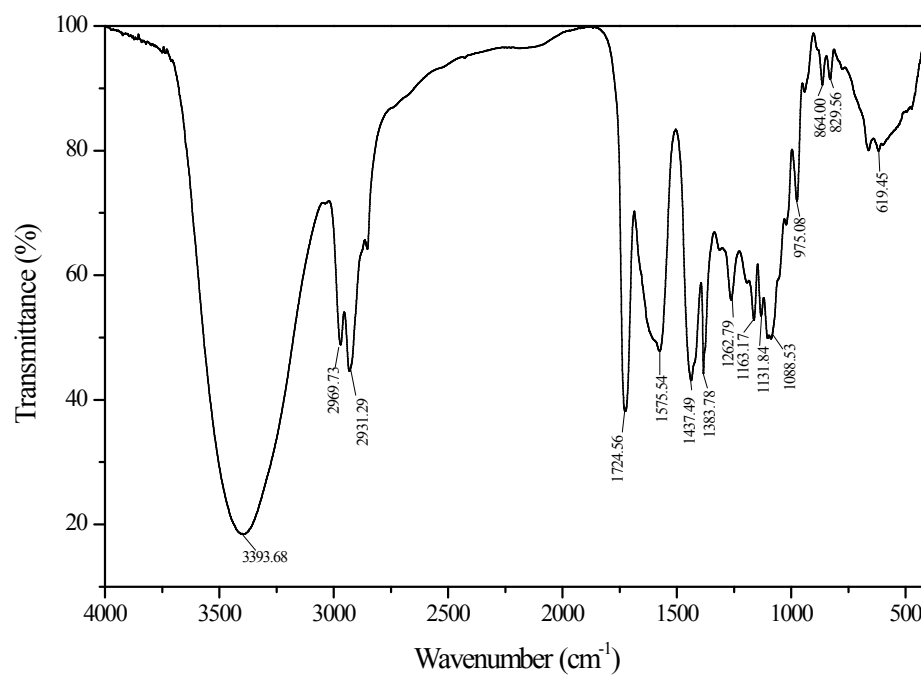

Figure S32. IR Spectrum of compound 4

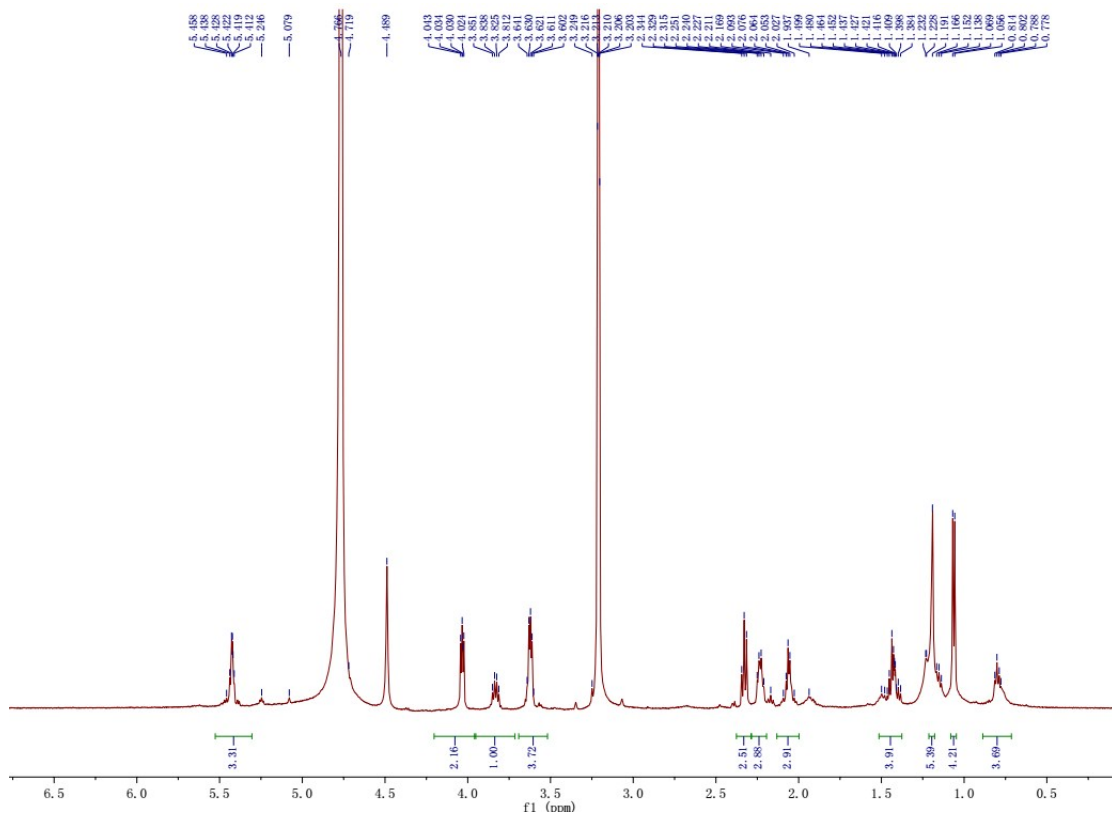

Figure S33.  $^1\text{H}$  NMR of compound **5** in MeOD

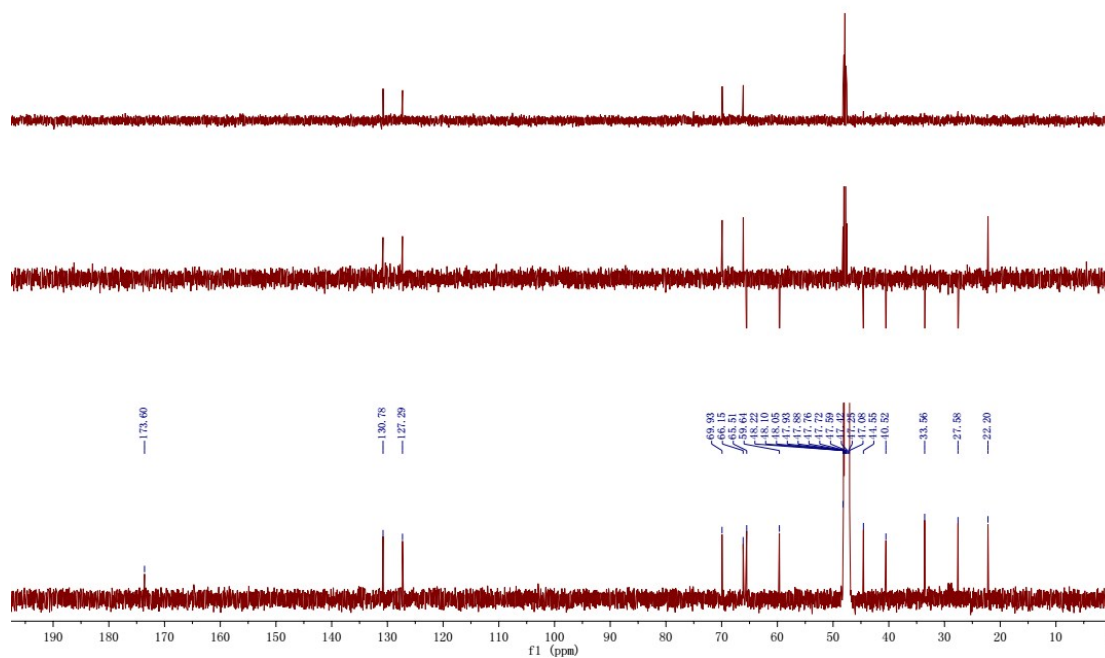

Figure S34.  $^{13}\text{C}$  NMR of compound **5** in MeOD

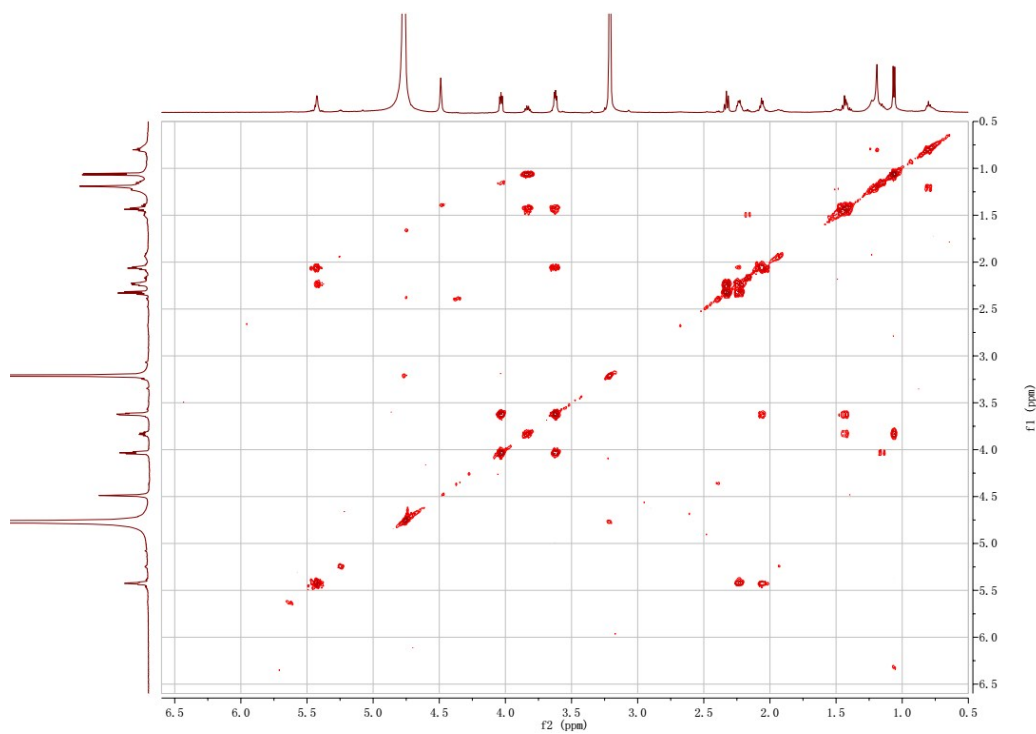

Figure S35.  $^1\text{H}$ - $^1\text{H}$  COSY spectrum of compound **5** in MeOD

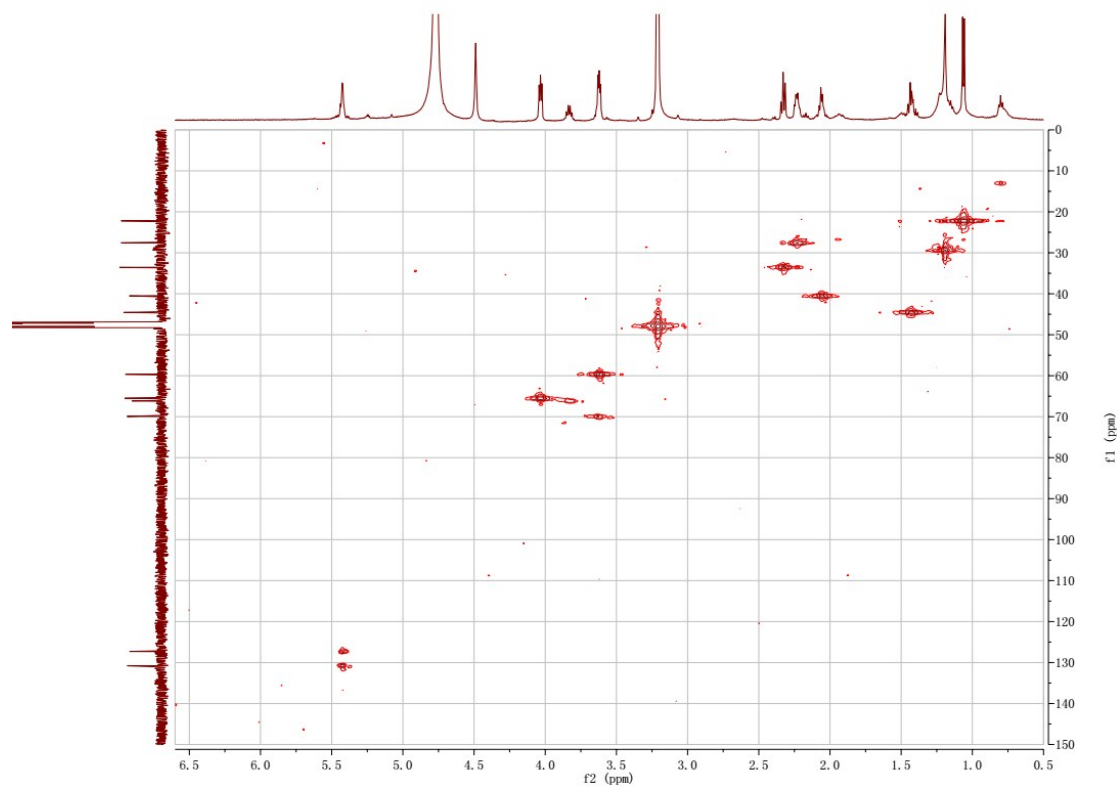

Figure S36. HSQC spectrum of compound **5** in MeOD

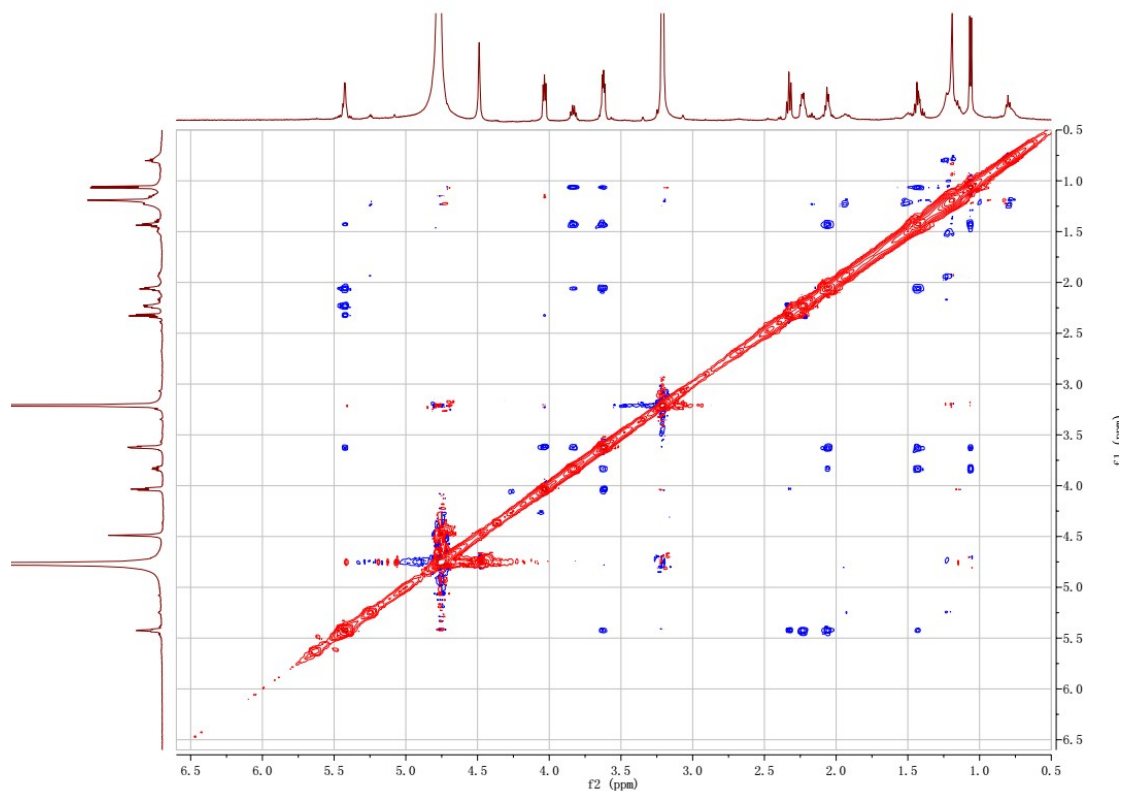

Figure S37. NOESY spectrum of compound **5** in MeOD

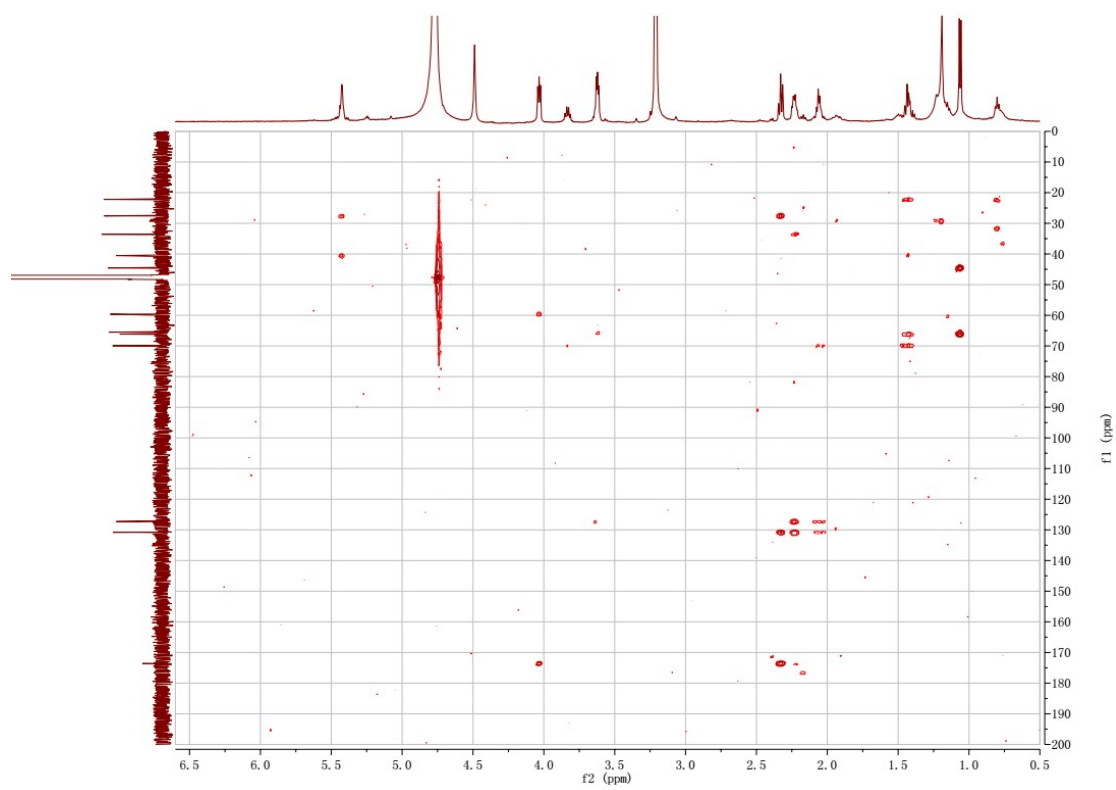

Figure S38. HMBC spectrum of compound **5** in MeOD

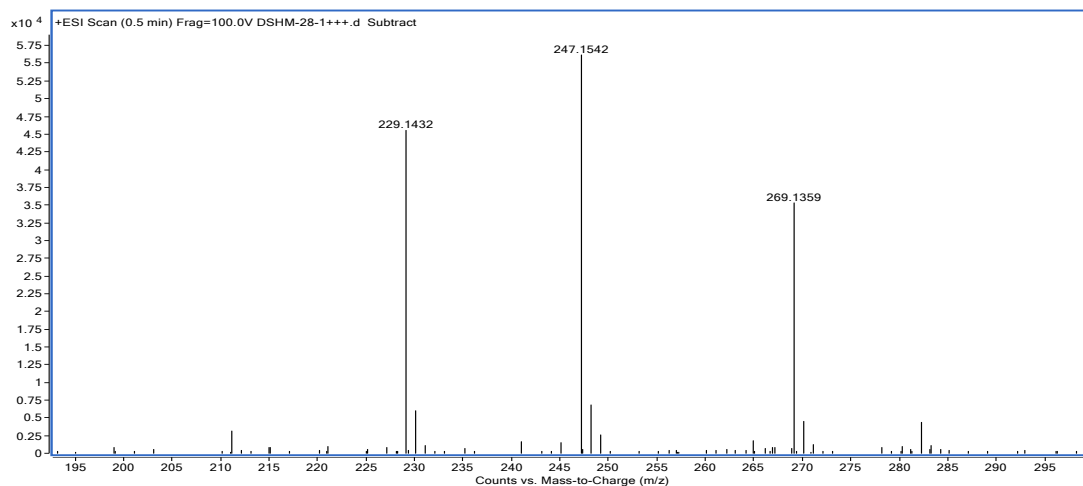

Figure S39. HRESIMS spectrum of compound **5** in MeOD

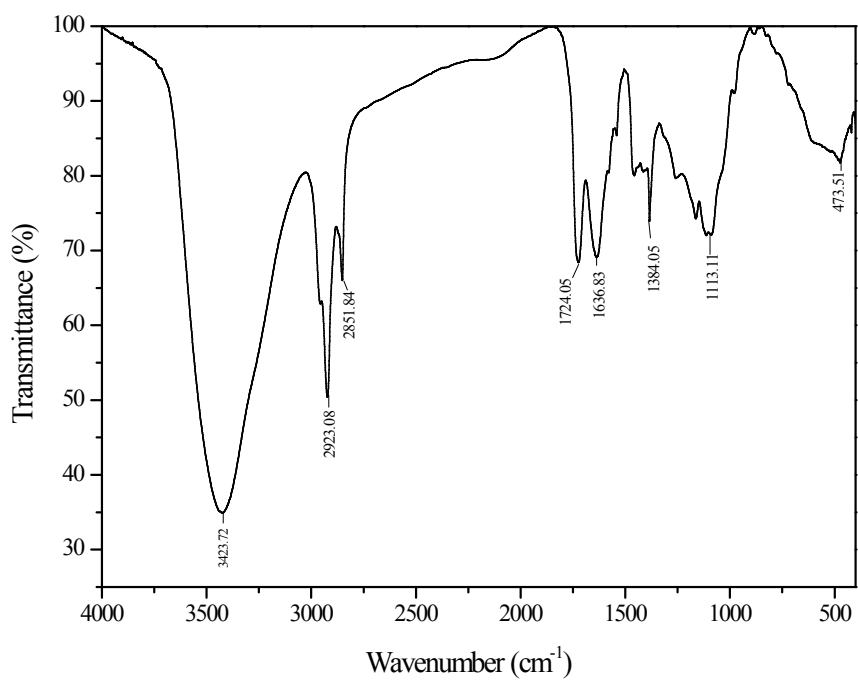

Figure S40. IR Spectrum of compound **5**





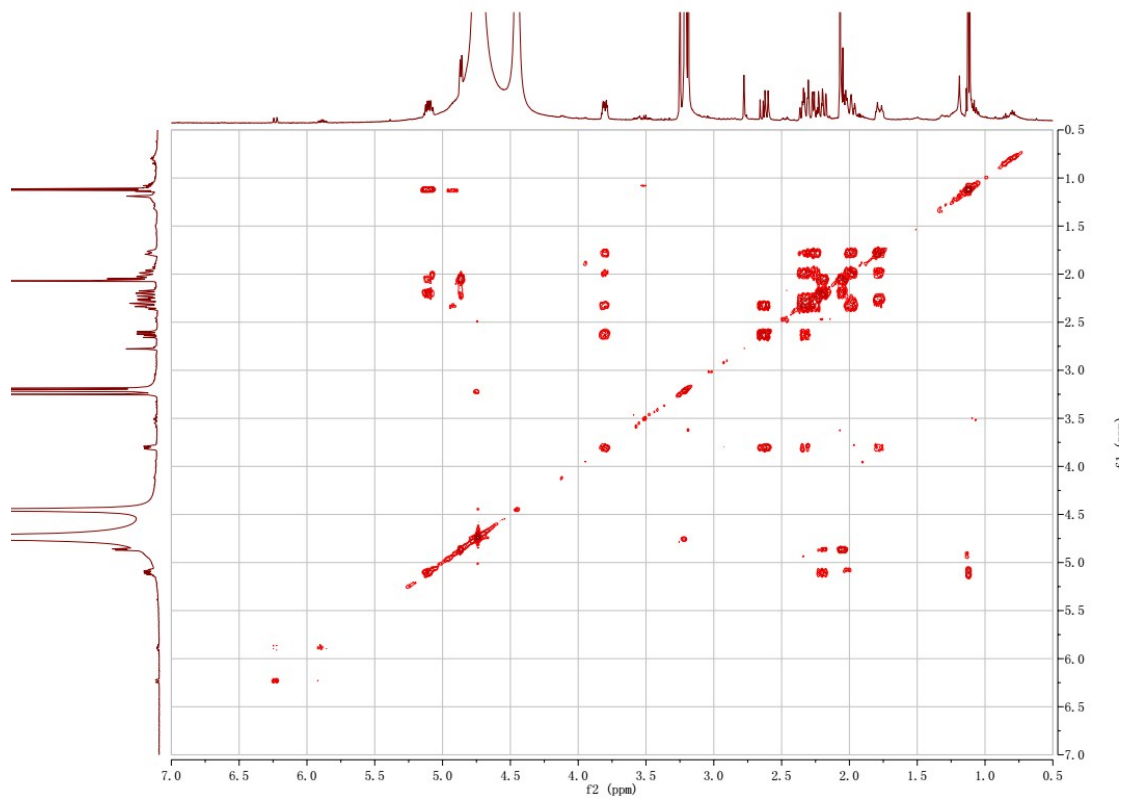

Figure S43.  $^1\text{H}$ - $^1\text{H}$  COSY spectrum of compound **6** in MeOD

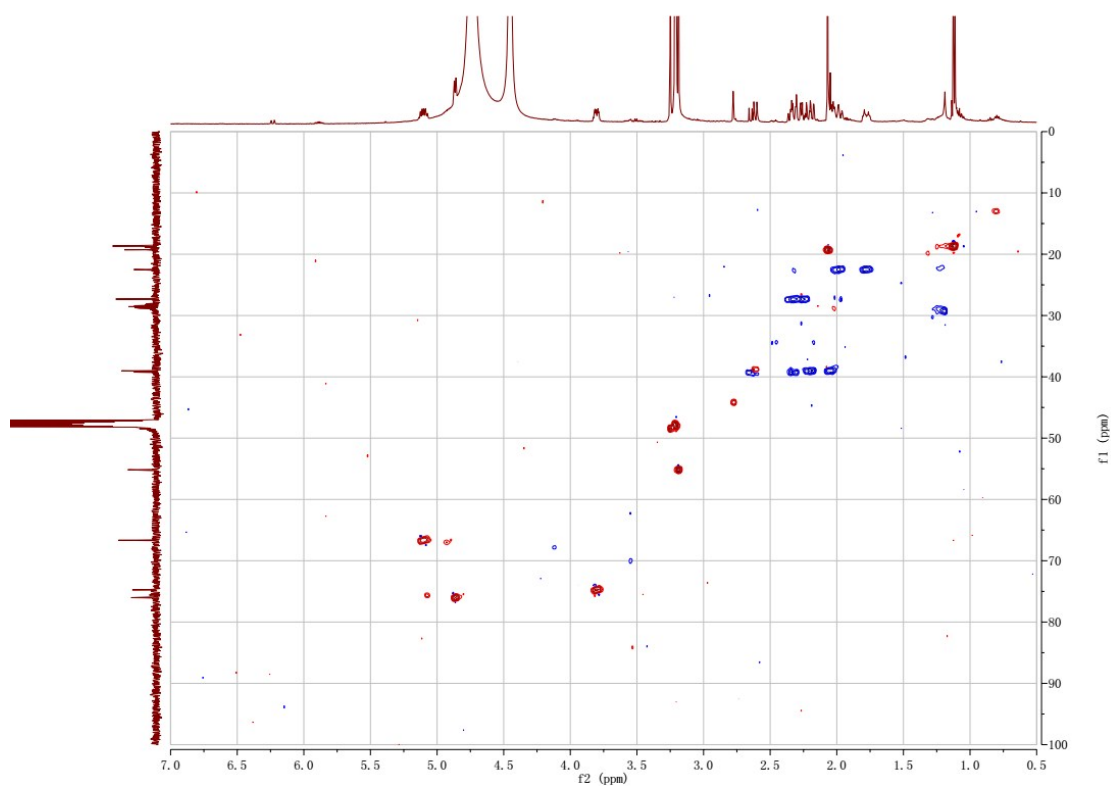

Figure 44. HSQC spectrum of compound **6** in MeOD

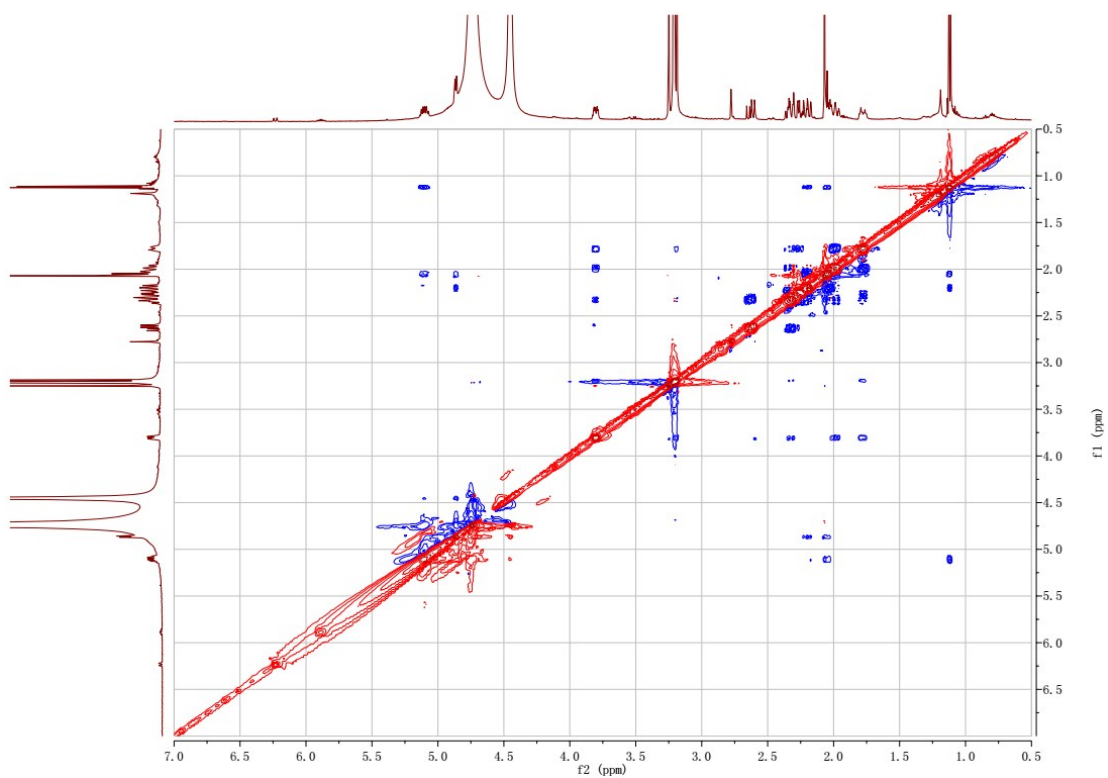

Figure S45. NOESY spectrum of compound **6** in MeOD

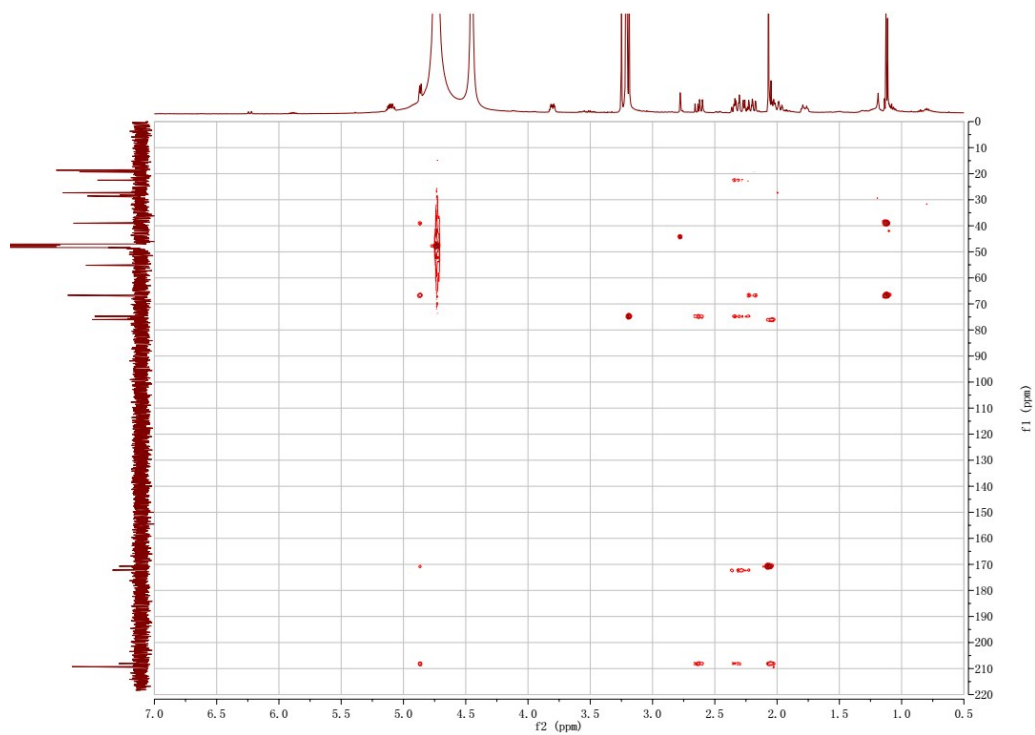

Figure 46. HMBC spectrum of compound **6** in MeOD

DSHM-7 #46 RT: 1.01 AV: 1 SB: 21 0.06-0.51 NL: 7.42E5  
T: FTMS + c ESI Full ms [150.00-800.00]

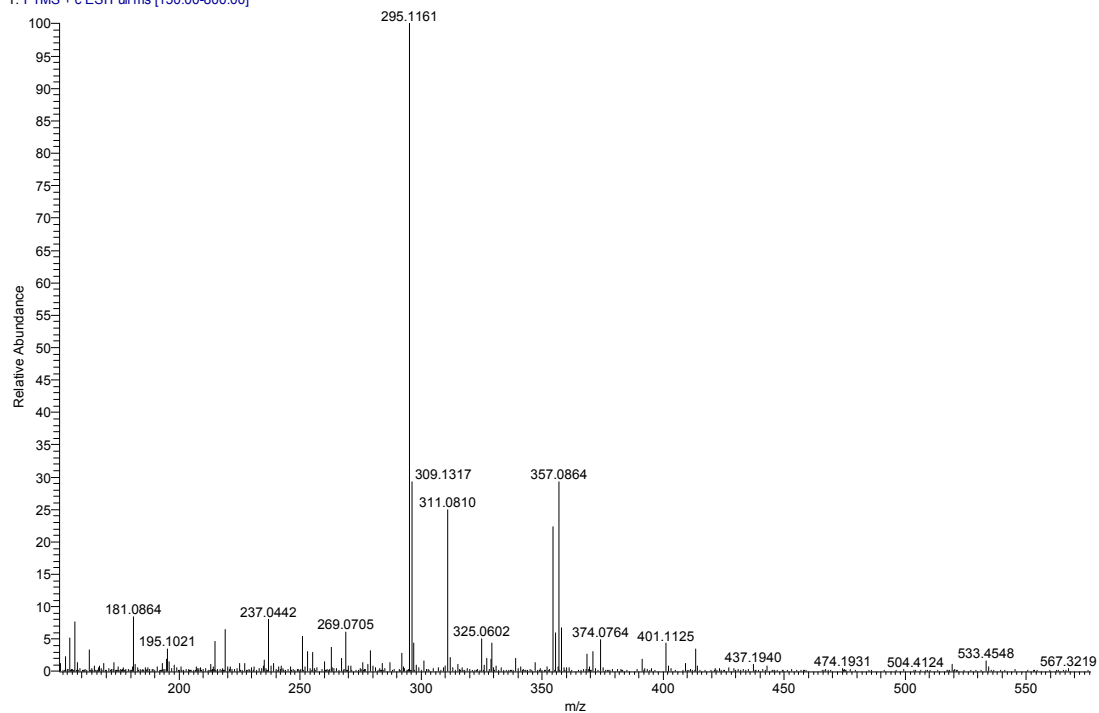

Figure S47. HRESIMS Spectrum of compound 6

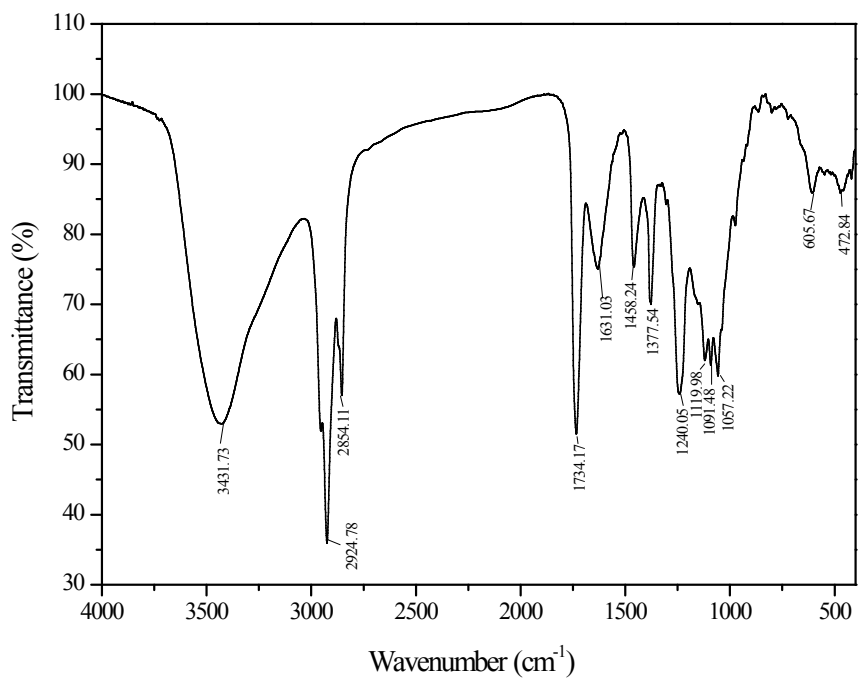

Figure S48. IR Spectrum of compound 6

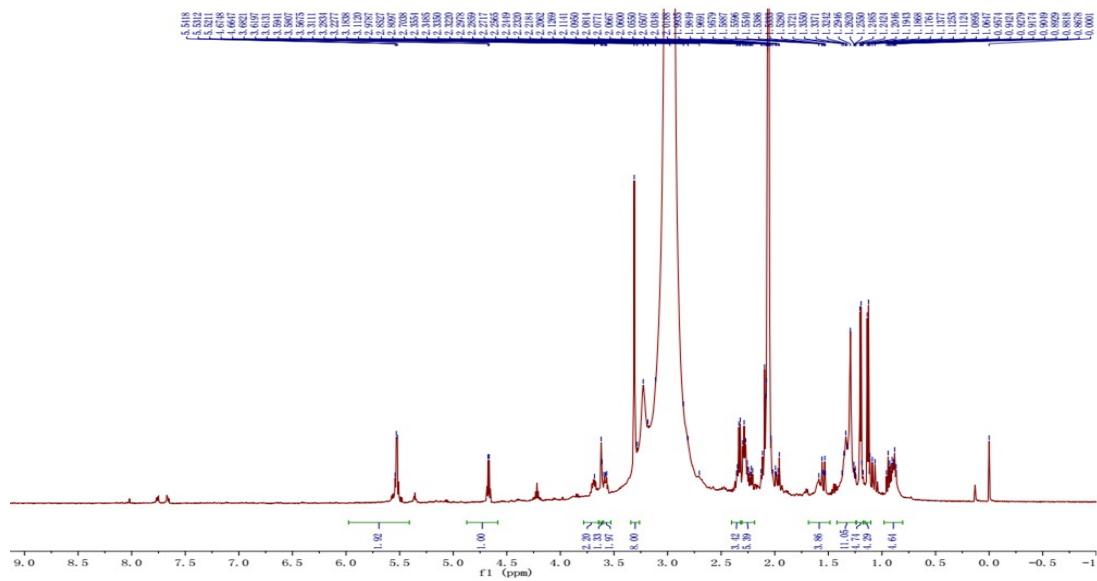

Figure S49.  $^1\text{H}$  NMR of compound **7** in acetone- $\text{d}_6$

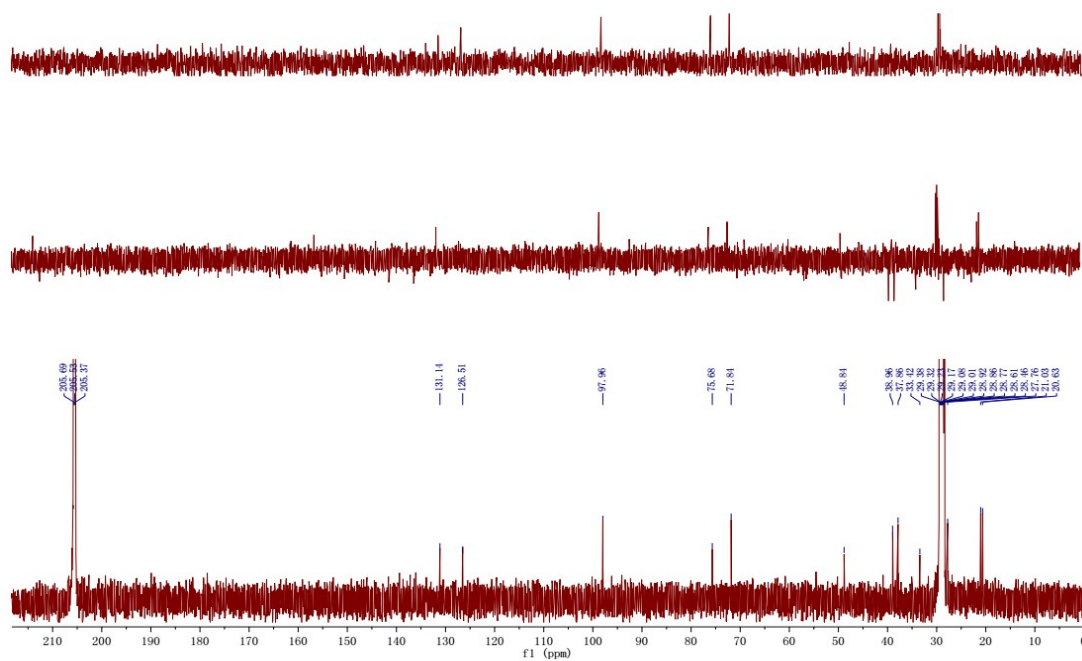

Figure S50.  $^{13}\text{C}$  NMR of compound **7** in acetone- $\text{d}_6$

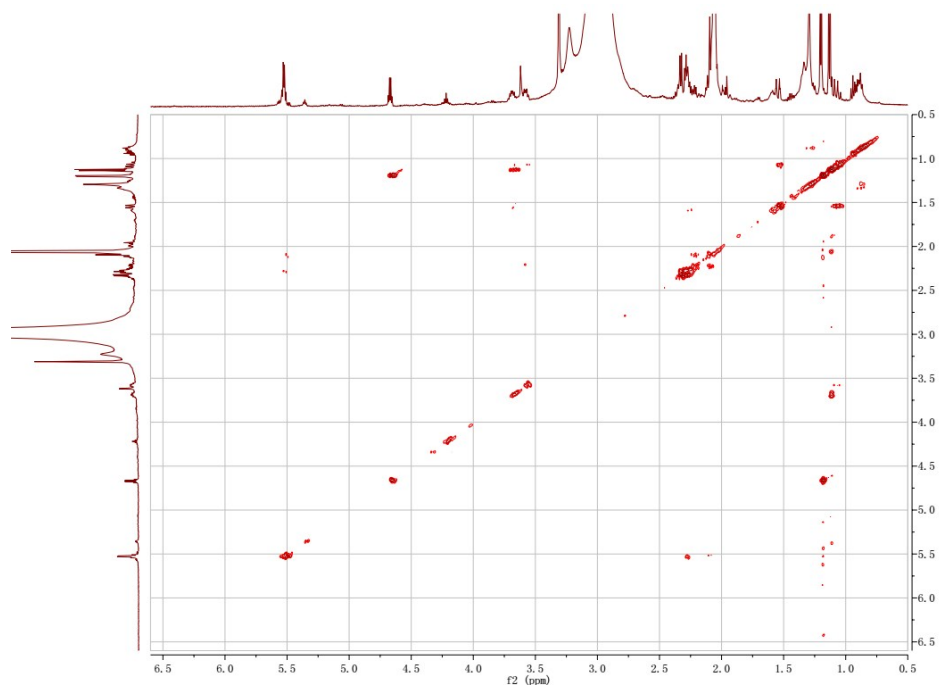

Figure S51.  $^1\text{H}$ - $^1\text{H}$  COSY spectrum of compound **7** in acetone- $\text{d}_6$

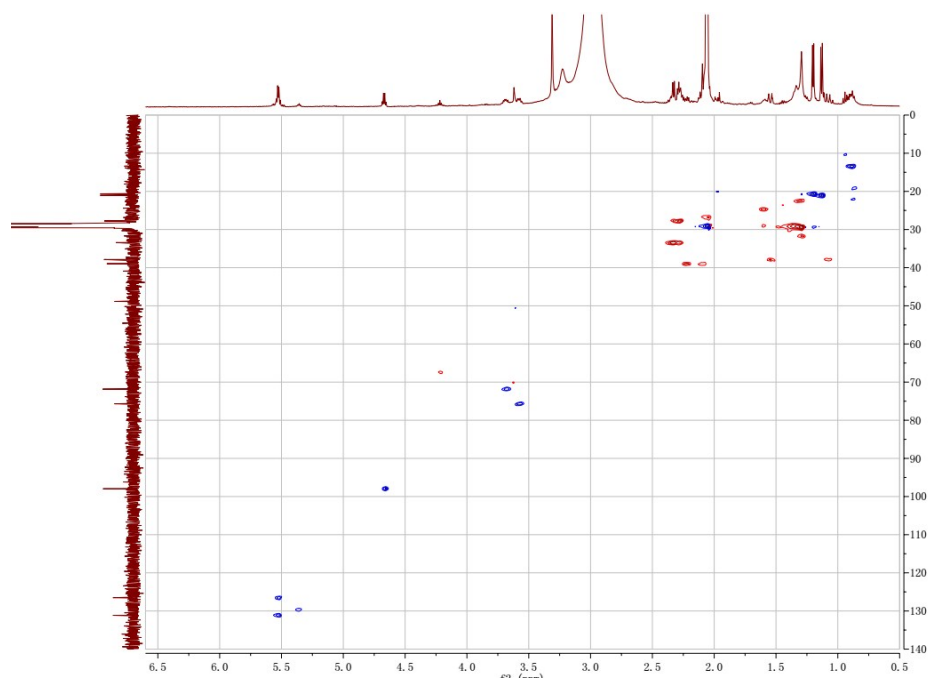

Figure S52. HSQC spectrum of compound **7** in acetone- $\text{d}_6$

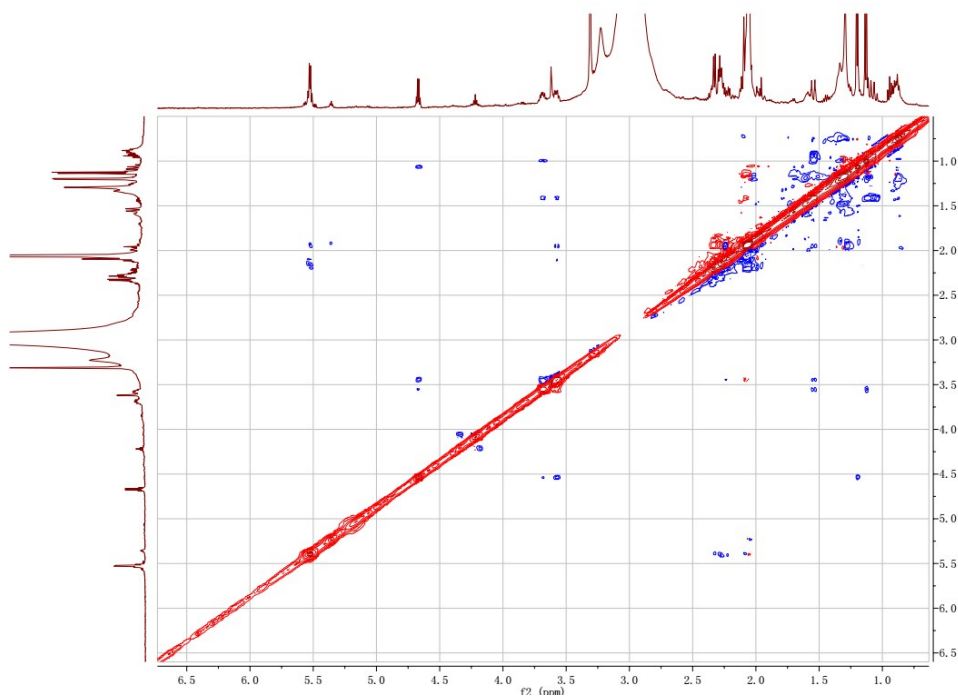

Figure S53. NOESY spectrum of compound **7** in acetone-d<sub>6</sub>

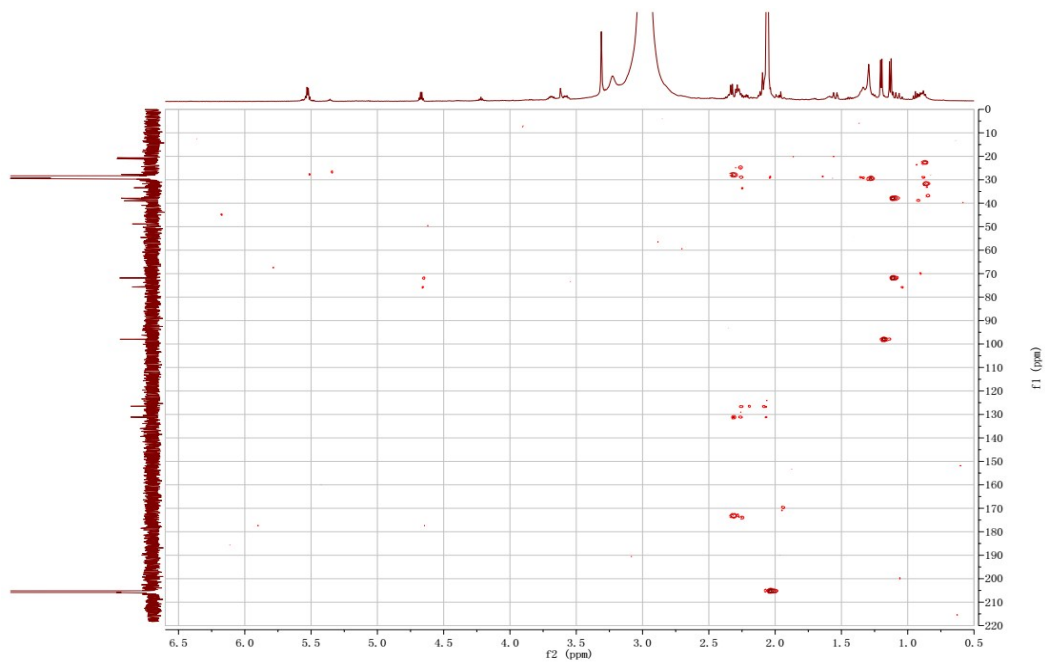

Figure S54. HMBC Spectrum of compound **7** in acetone-d<sub>6</sub>

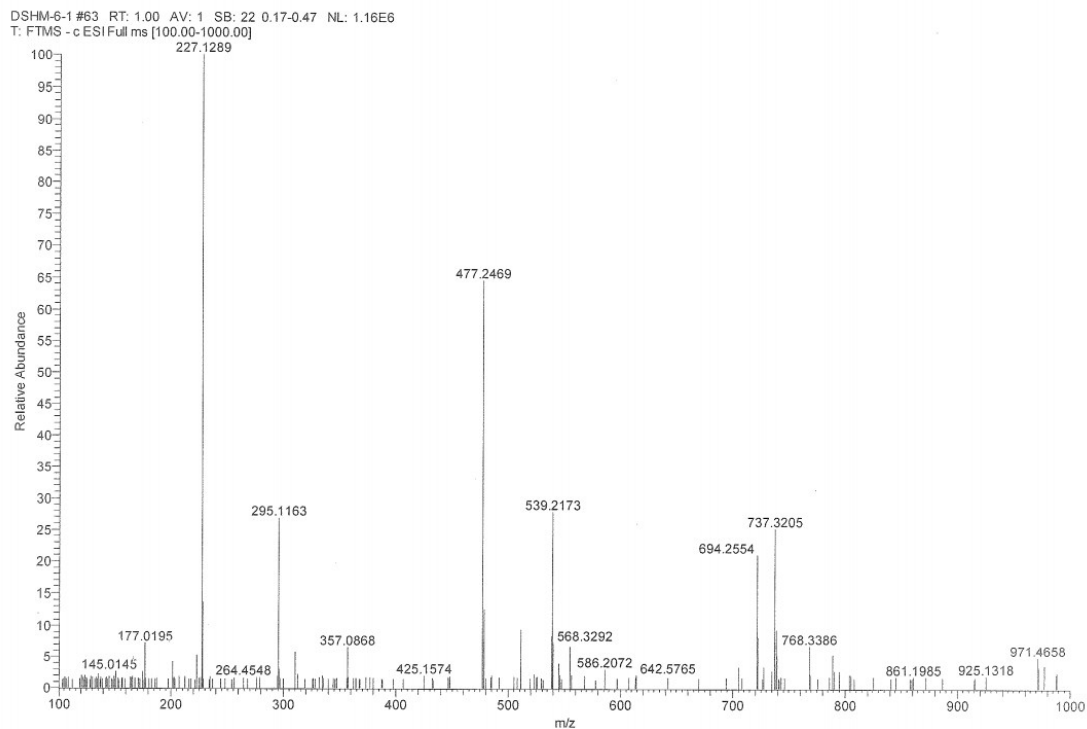

Figure S55. HRESIMS Spectrum of compound 7

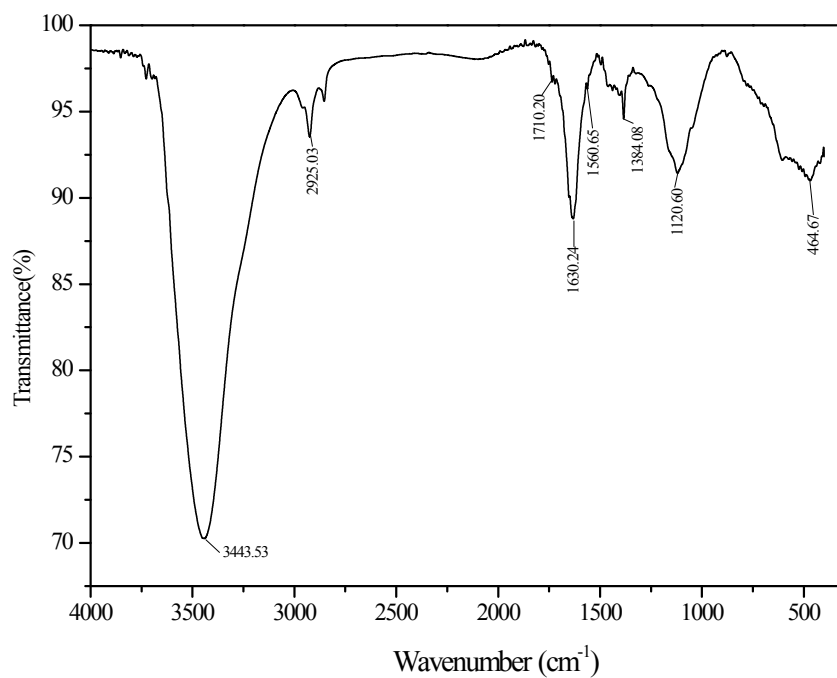

Figure S56. IR Spectrum of compound 7

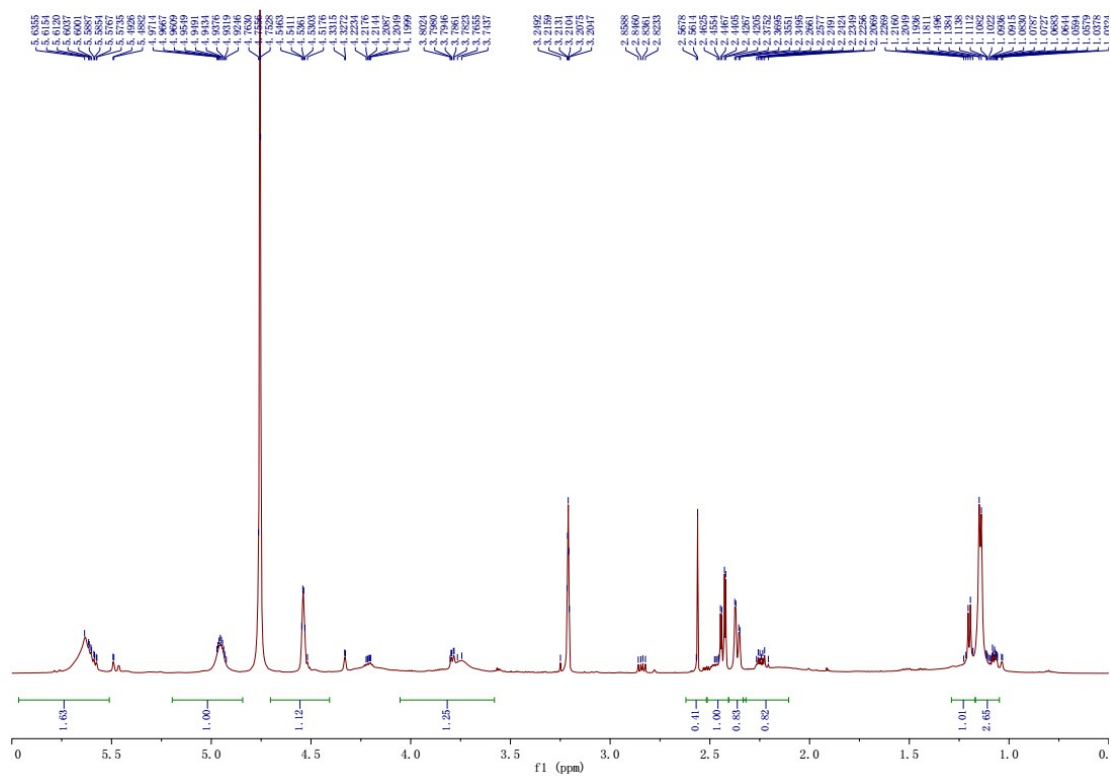

Figure S57.  $^1\text{H}$  NMR of compound **8** in MeOD

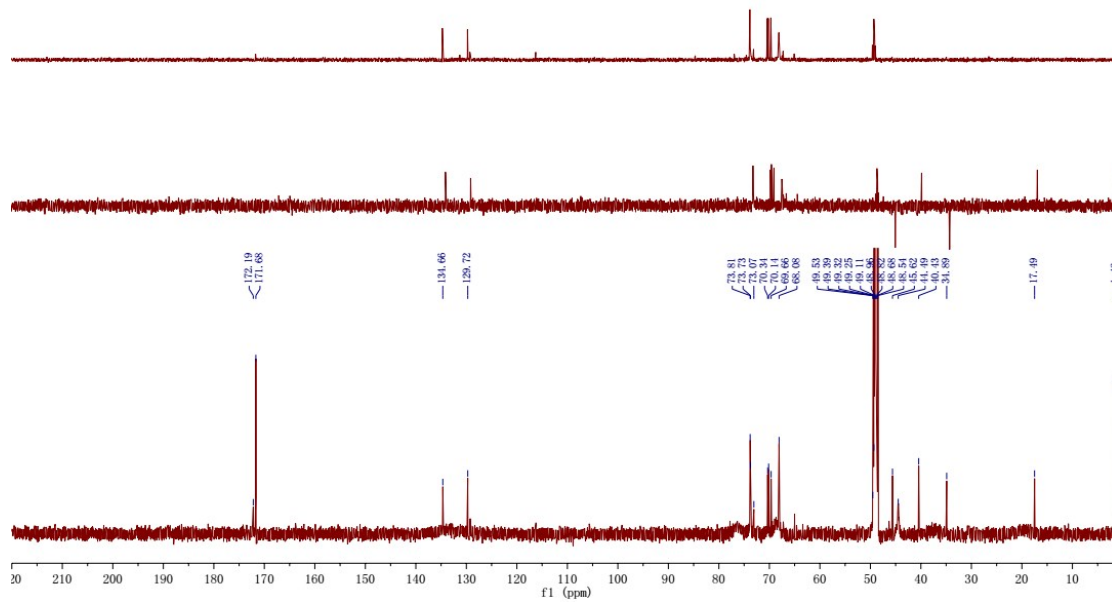

Figure S58.  $^{13}\text{C}$  NMR of compound **8** in MeOD



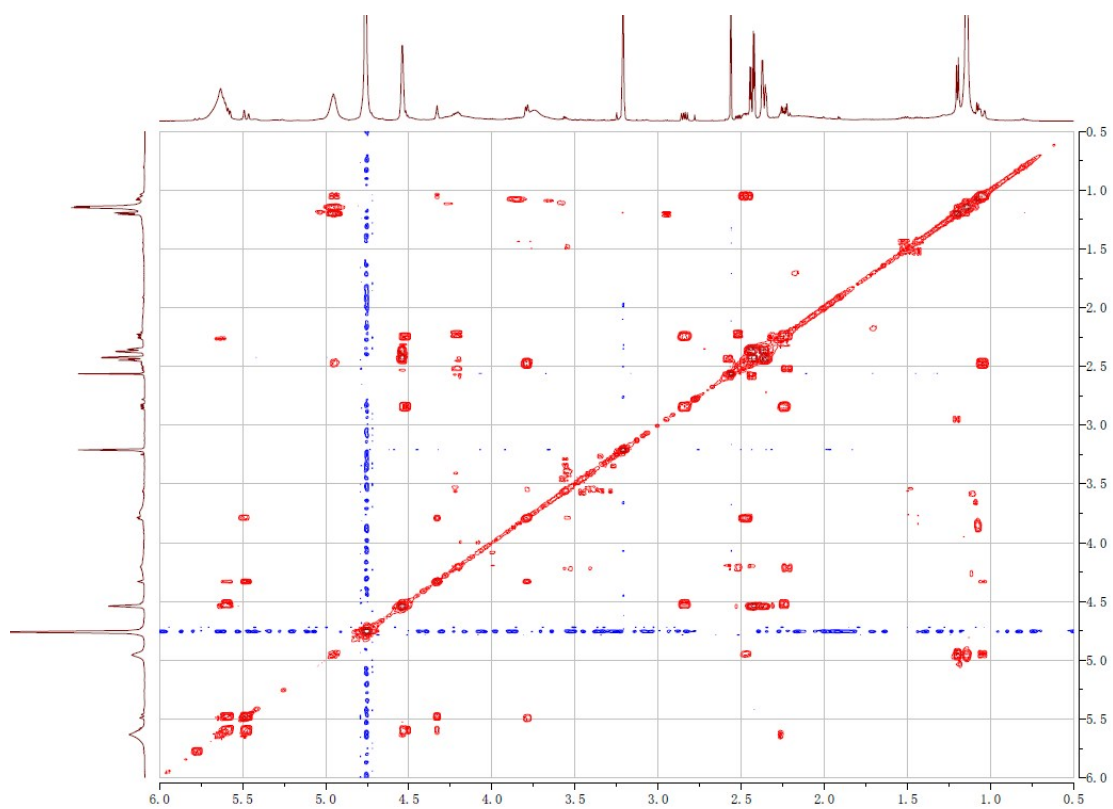

Figure S59.  $^1\text{H}$ - $^1\text{H}$  COSY spectrum of compound **8** in MeOD

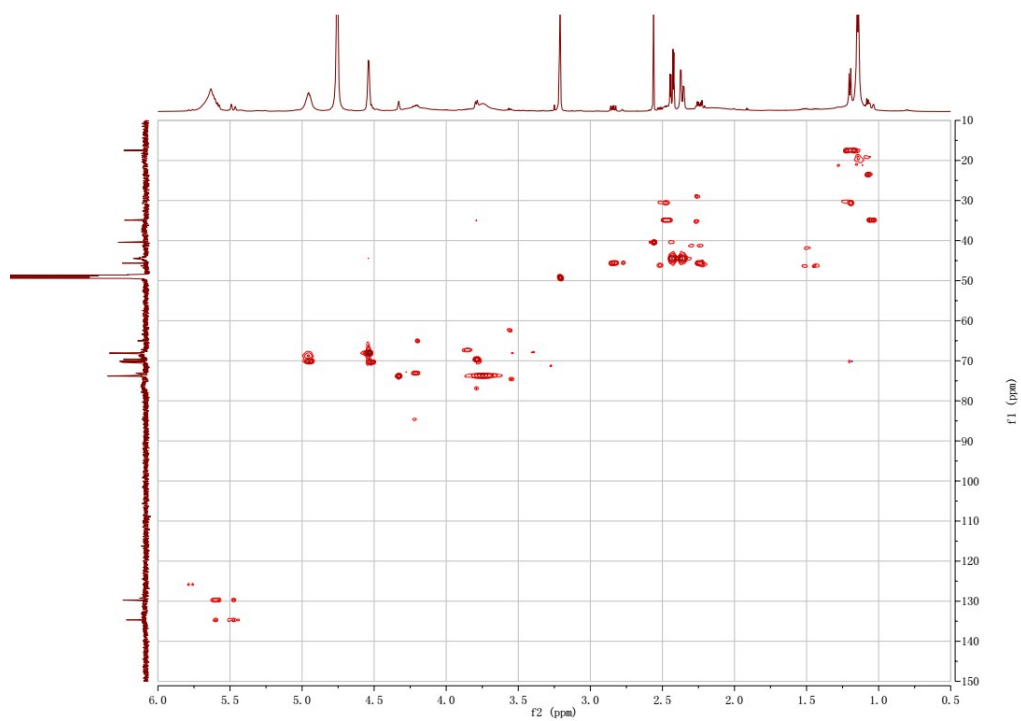

Figure S60. HSQC spectrum of compound **8** in MeOD

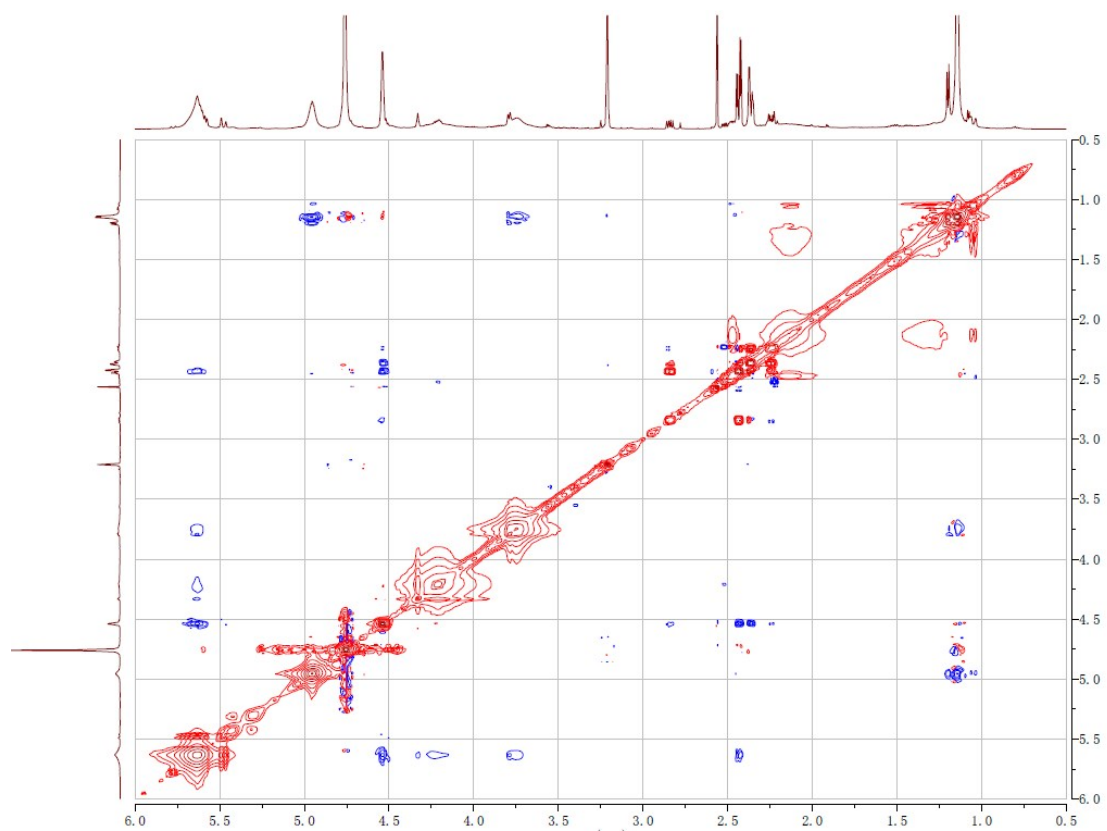

Figure S61. NOESY spectrum of compound **8** in MeOD

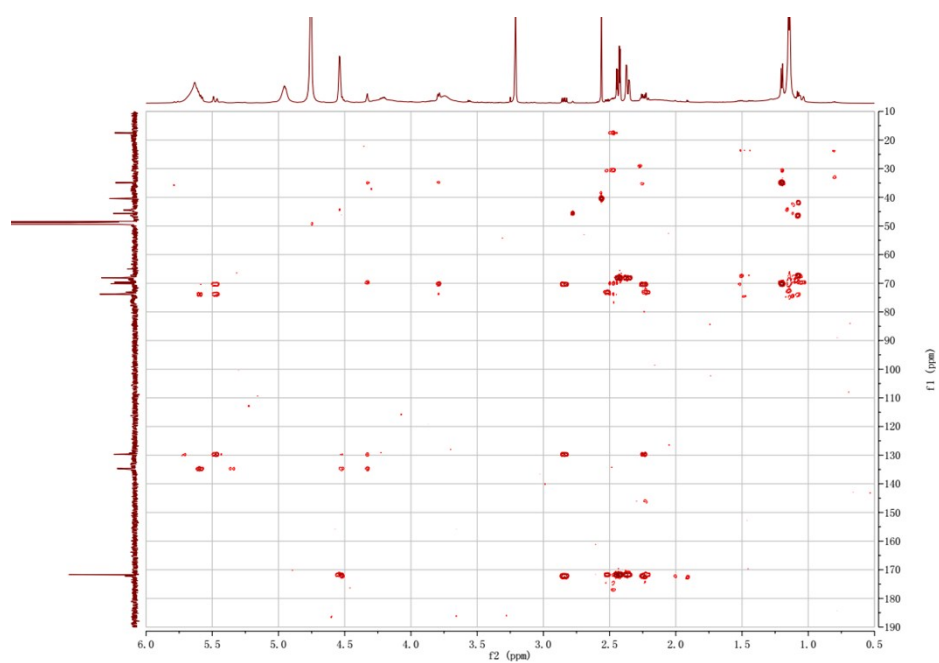

Figure S62. HMBC spectrum of compound **8** in MeOD

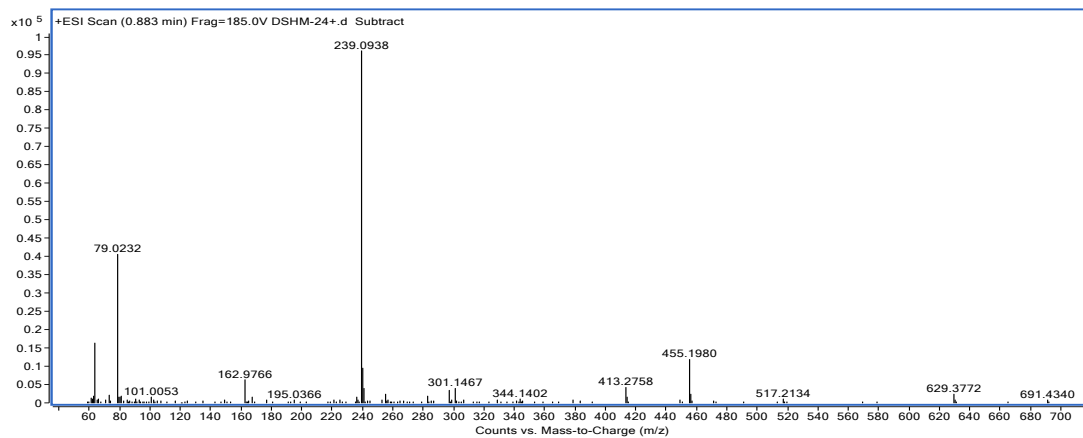

Figure S63. HRESIMS spectrum of compound **8**

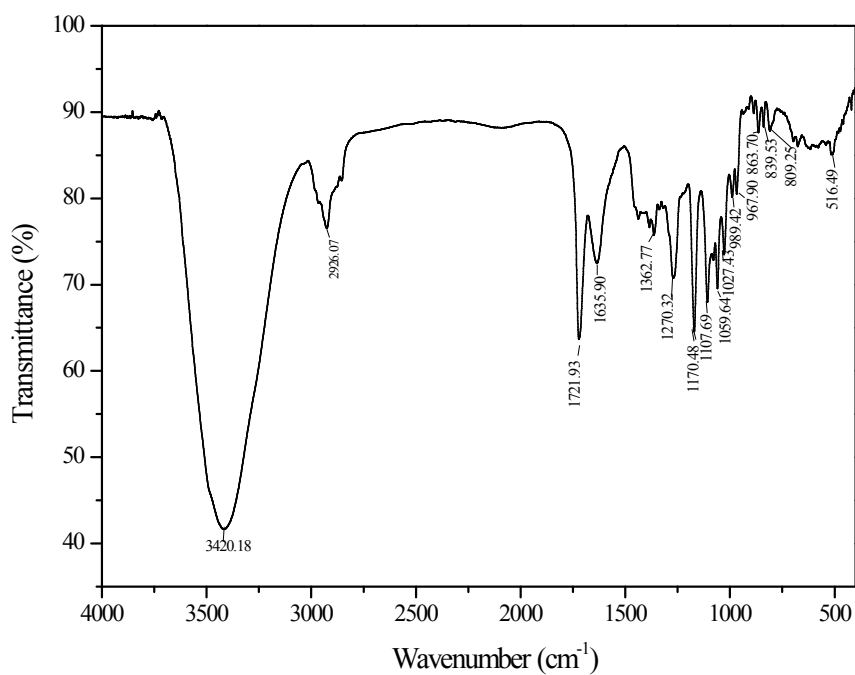

Figure S64. IR Spectrum of compound **8**

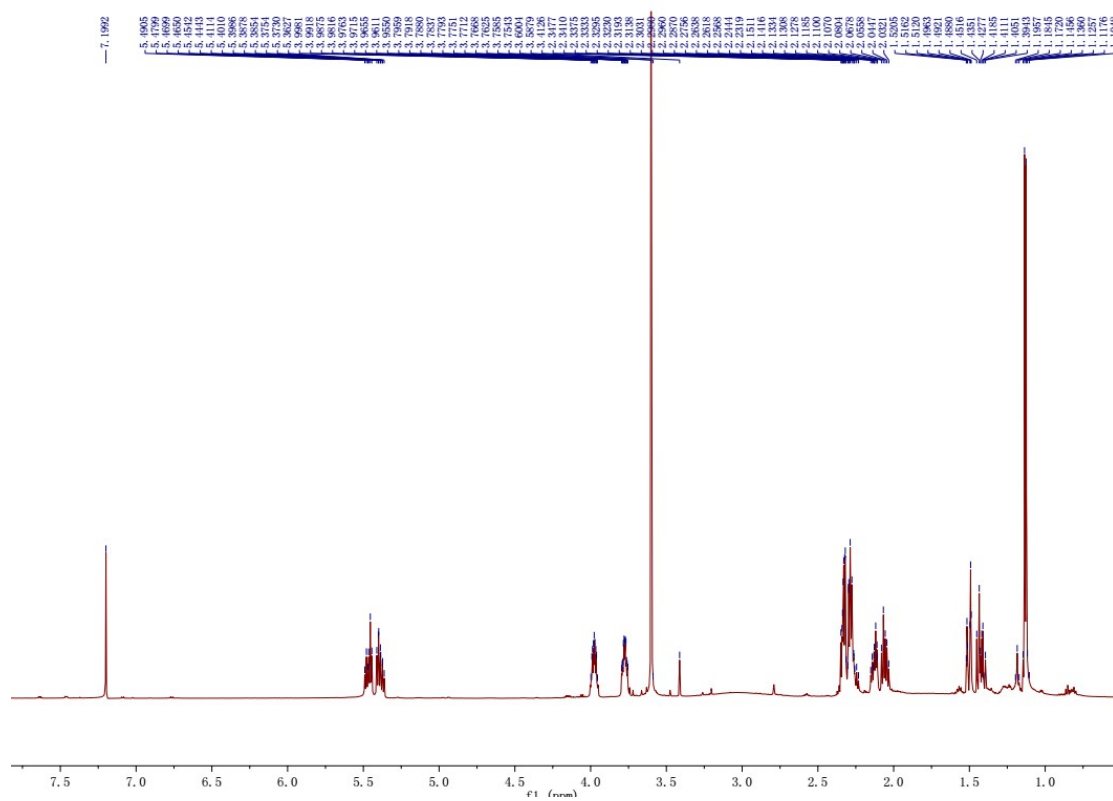

Figure S65. <sup>1</sup>H NMR of compound **9** in CDCl<sub>3</sub>

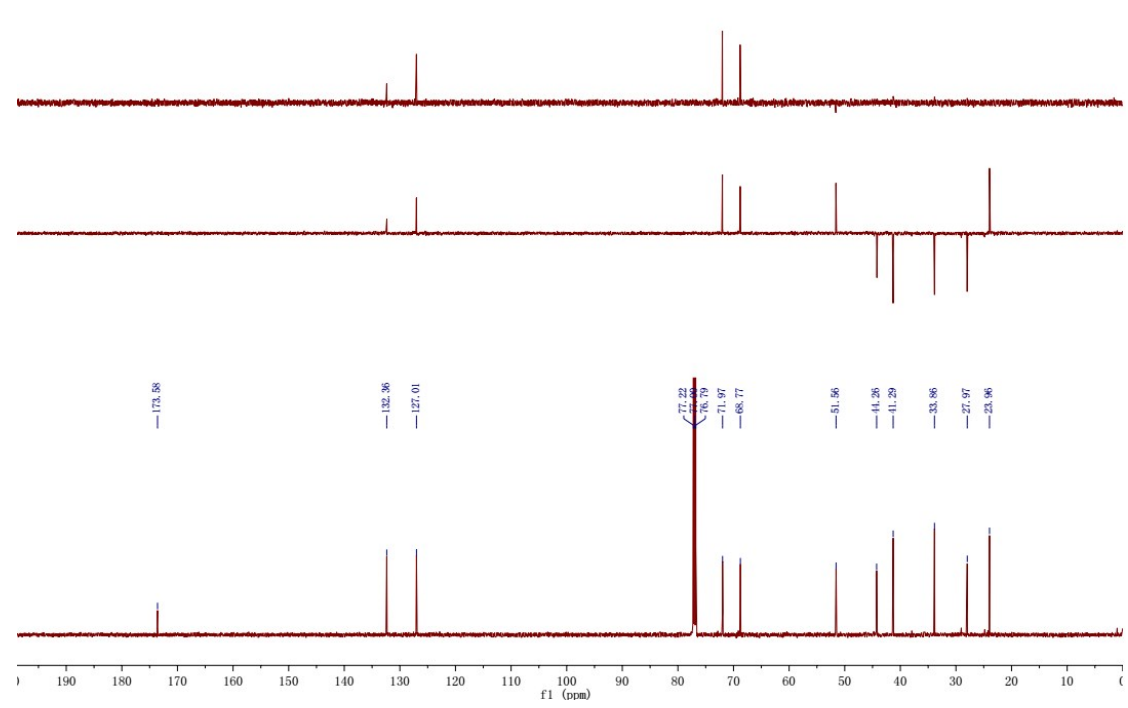

Figure S66. <sup>13</sup>C NMR of compound **9** in CDCl<sub>3</sub>

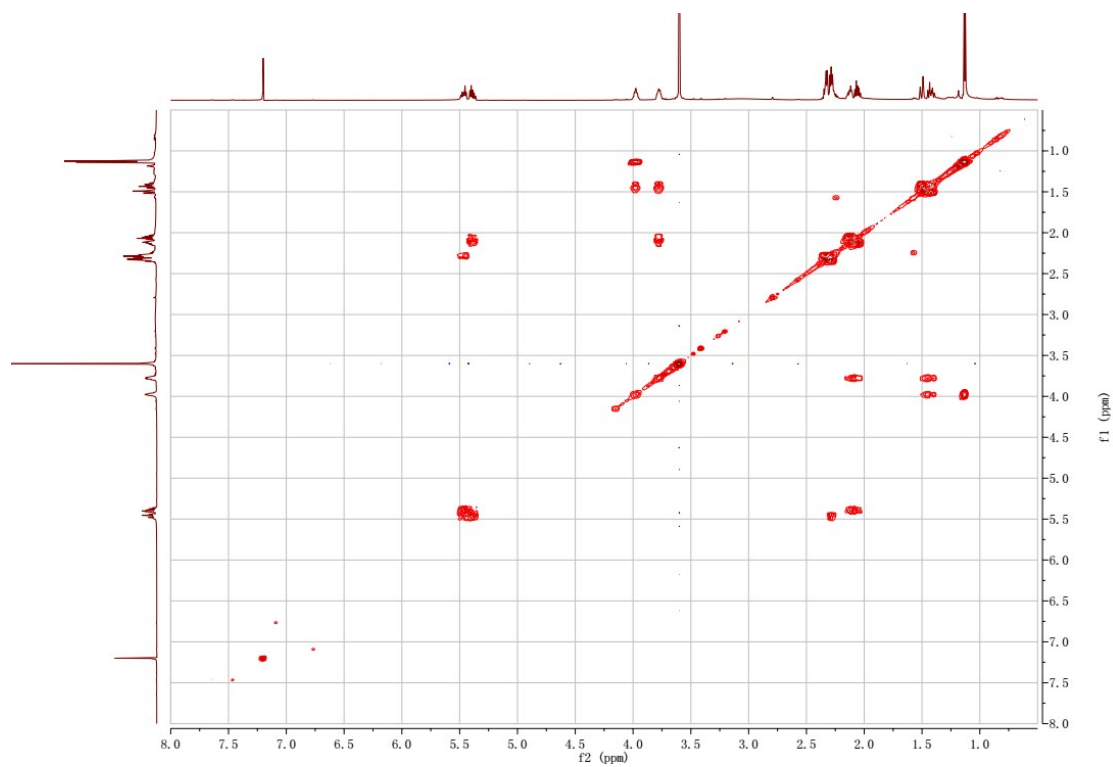

Figure S67.  $^1\text{H}$ - $^1\text{H}$  COSY spectrum of compound **9** in  $\text{CDCl}_3$

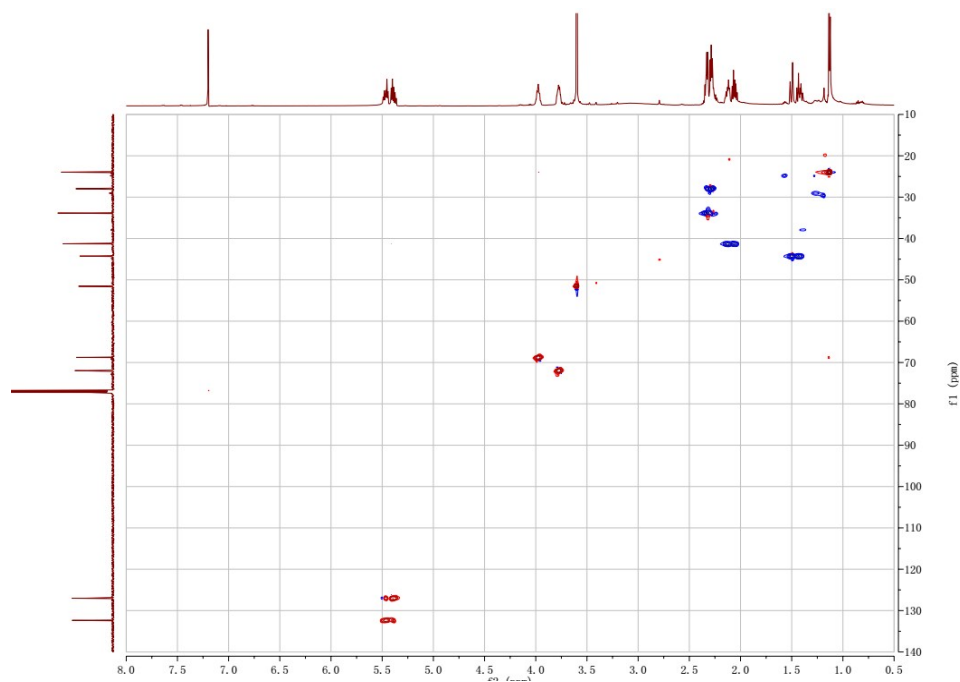

Figure S68. HSQC spectrum of compound **9** in  $\text{CDCl}_3$

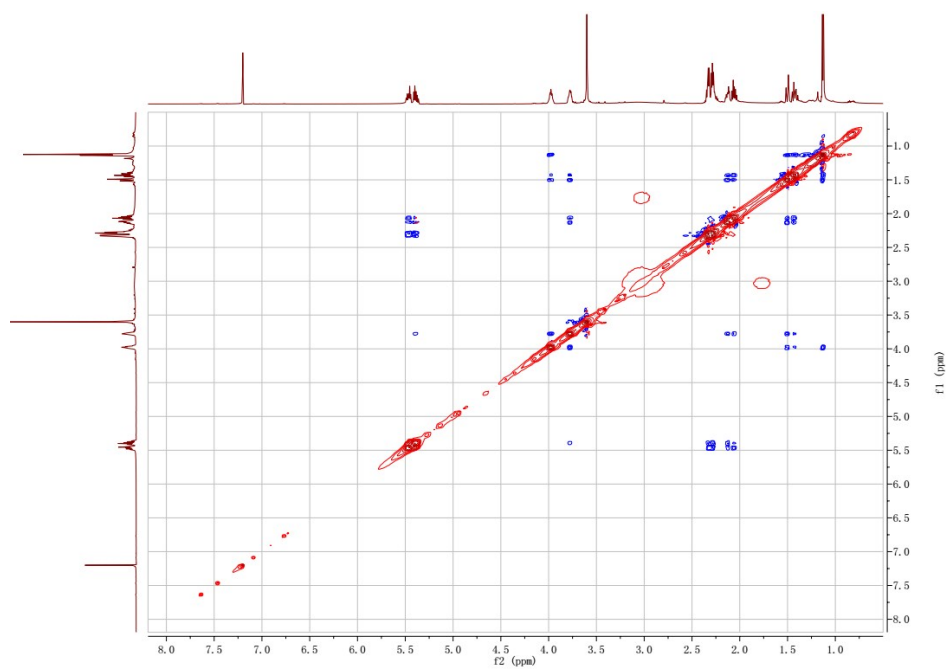

Figure S69. NOESY spectrum of compound **9** in CDCl<sub>3</sub>

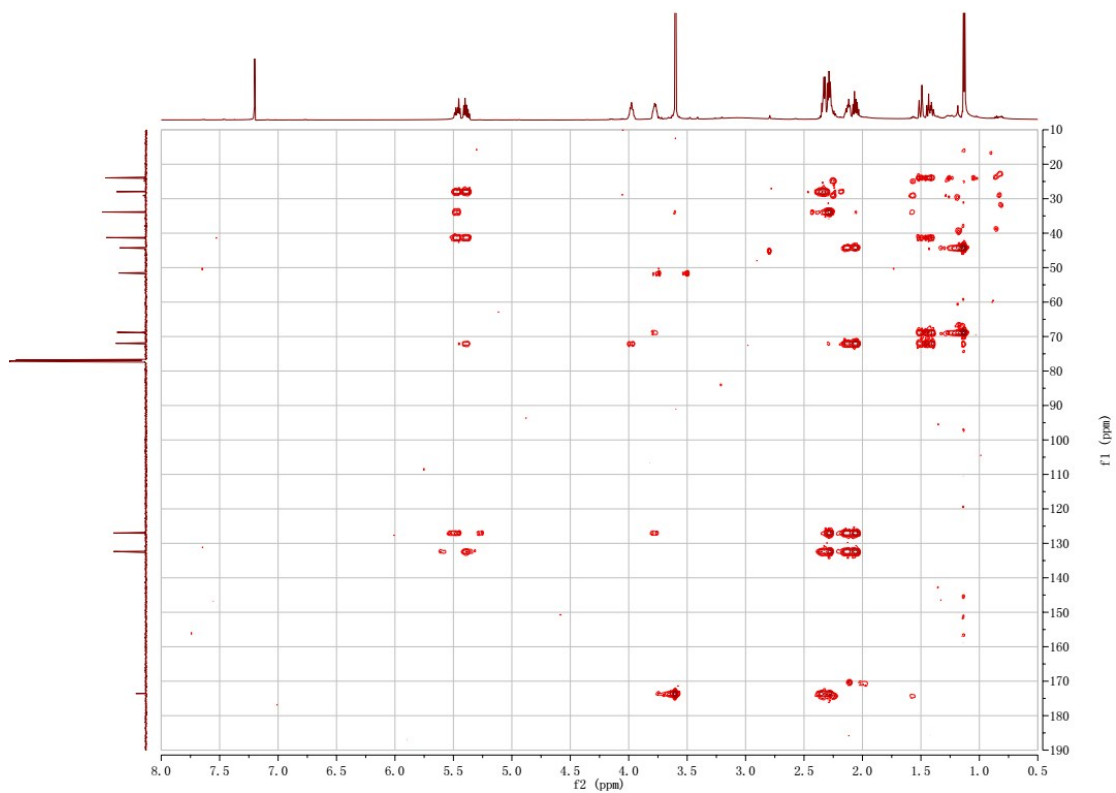

Figure S70. HMBC spectrum of compound **9** in CDCl<sub>3</sub>

DSHM-8 #44 RT: 0.96 AV: 1 SB: 10 0.04-0.24 NL: 9.74E4  
T: FTMS + c ESI Full ms [150.00-800.00]

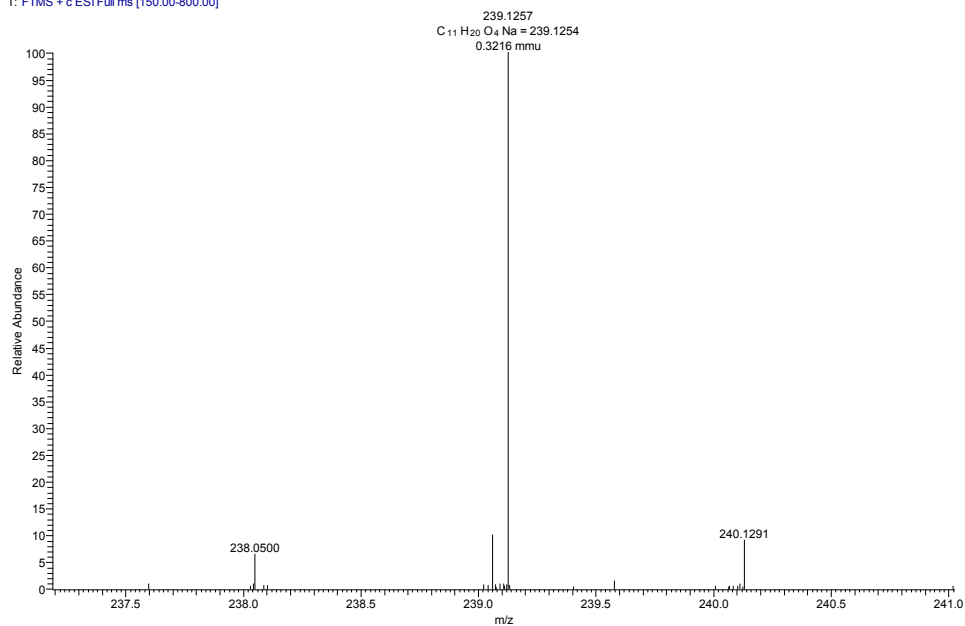

Figure S71. HRESIMS spectrum of compound **9**

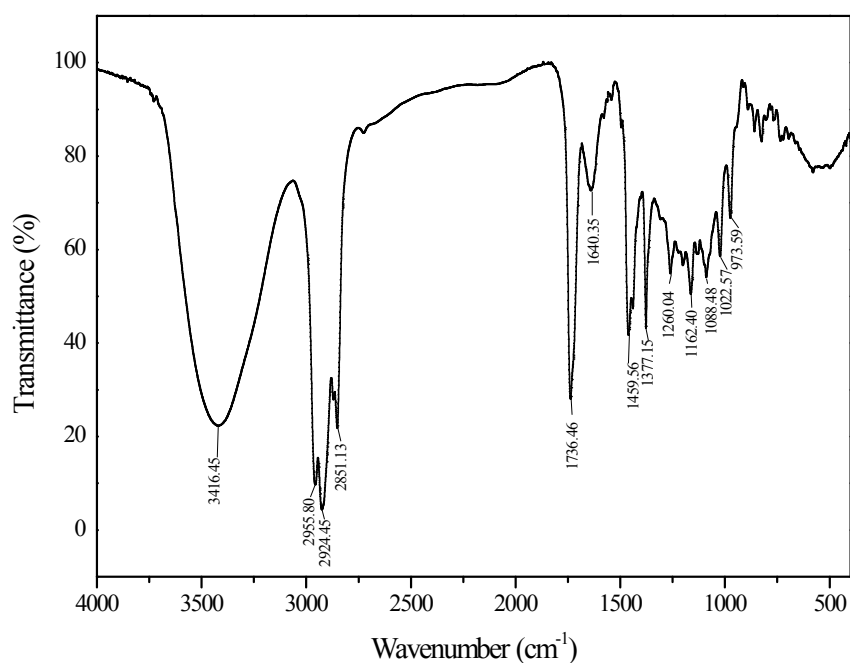

Figure S72. IR Spectrum of compound **9**

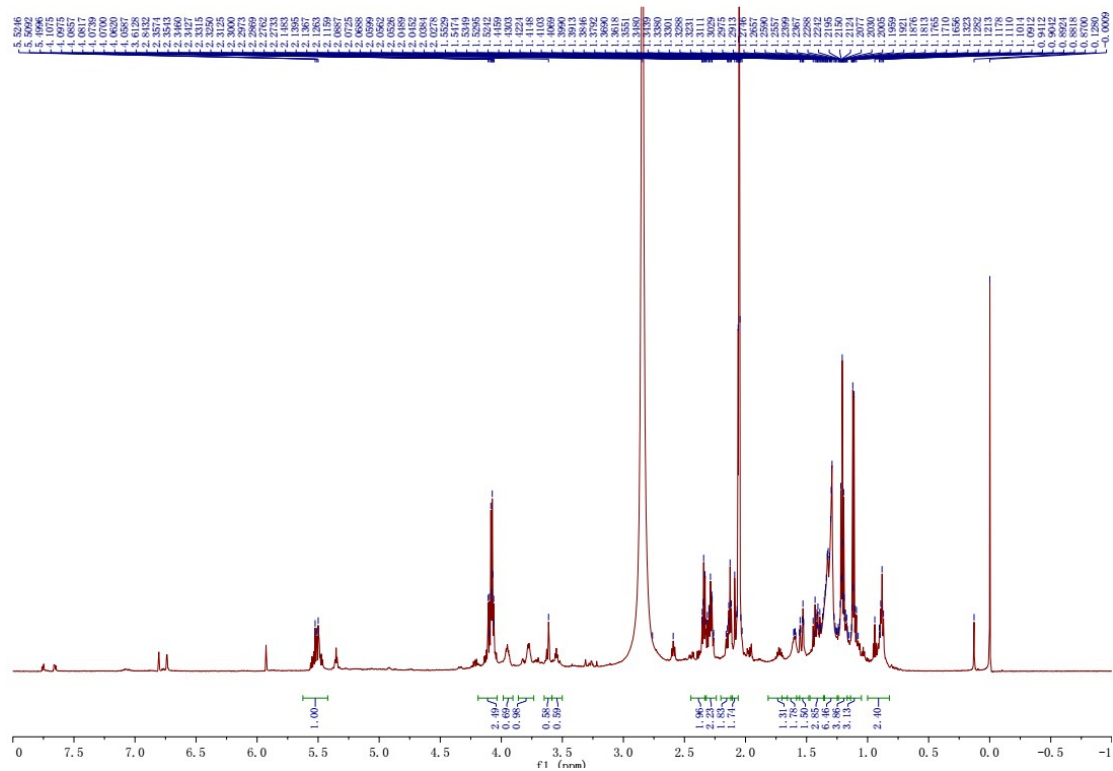

Figure S73.  $^1\text{H}$  NMR of compound **10** in acetone- $\text{d}_6$

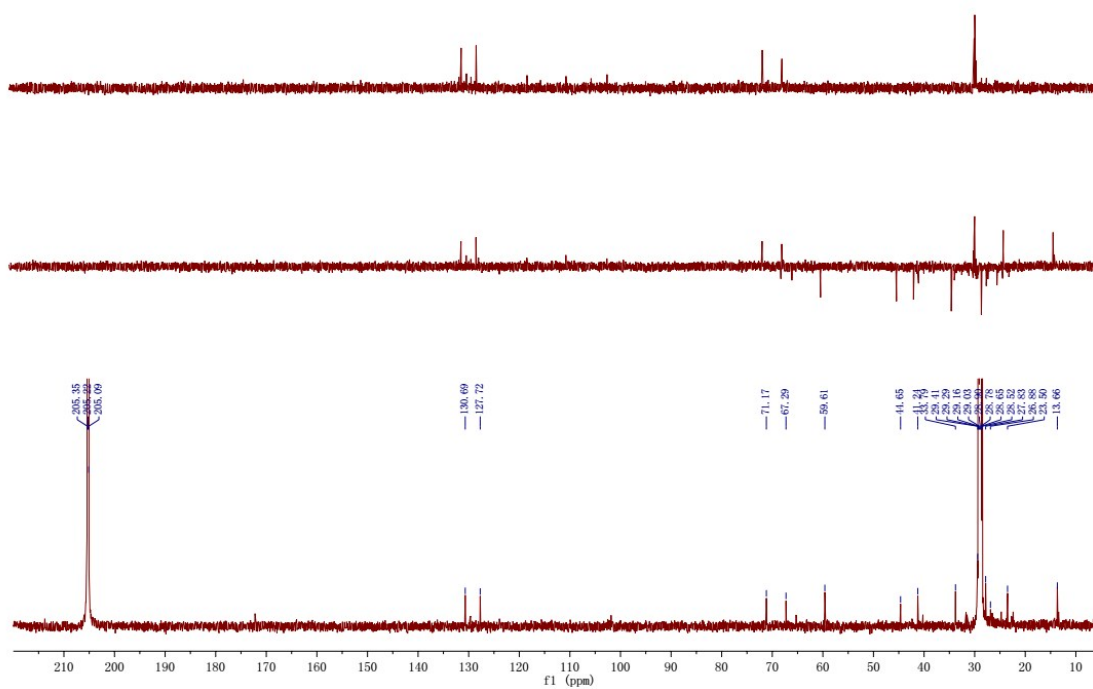

Figure S74.  $^{13}\text{C}$  NMR of compound **10** in acetone- $\text{d}_6$



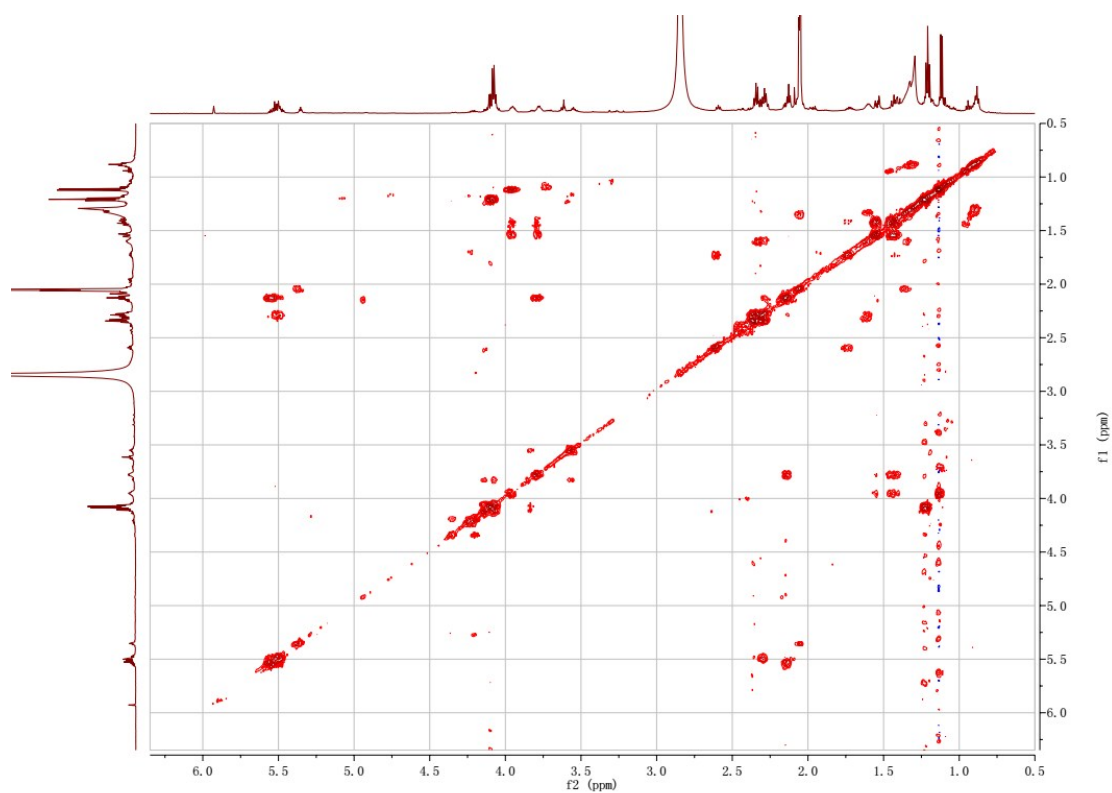

Figure S75.  $^1\text{H}$ - $^1\text{H}$  COSY Spectrum of compound **10** in acetone- $\text{d}_6$

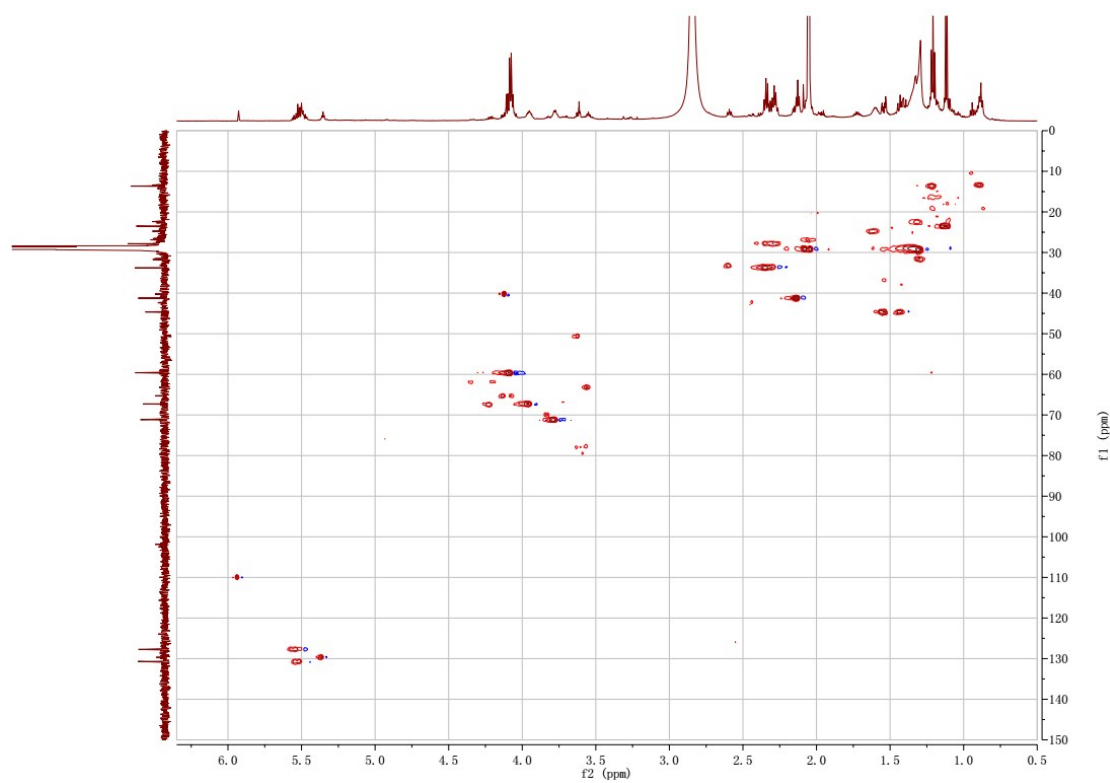

Figure S76. HSQC spectrum of compound **10** in acetone- $\text{d}_6$

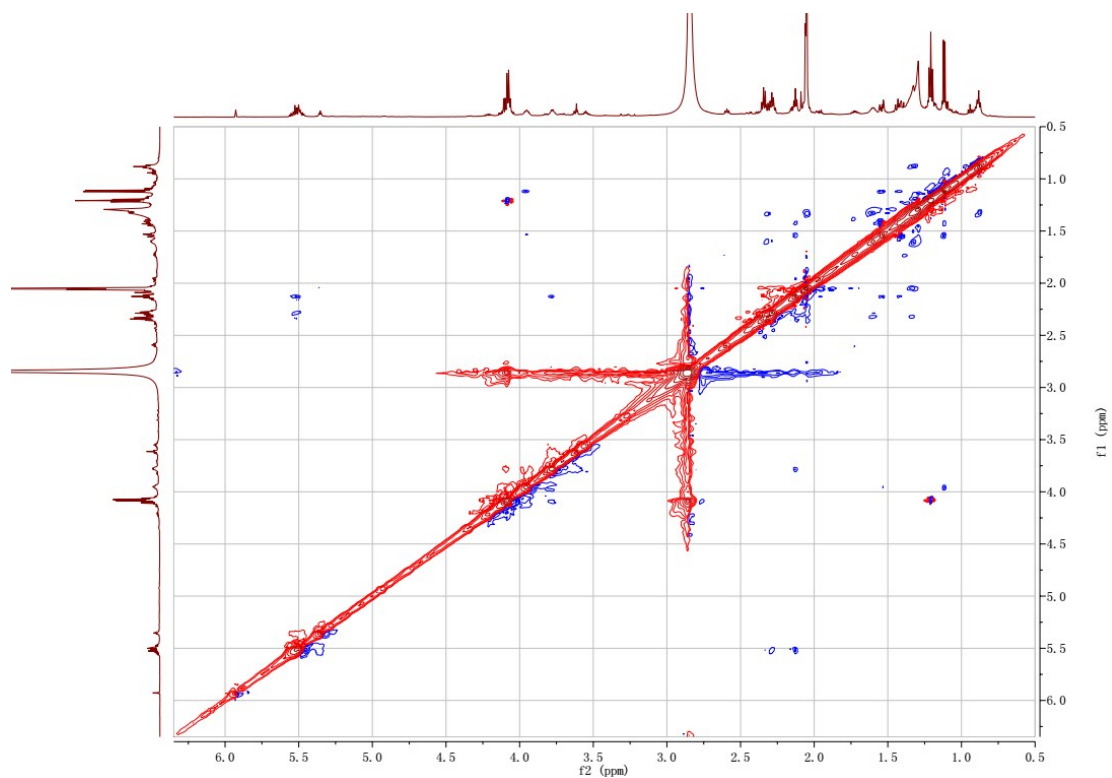

Figure S77. NOESY spectrum of compound **10** in acetone-d<sub>6</sub>

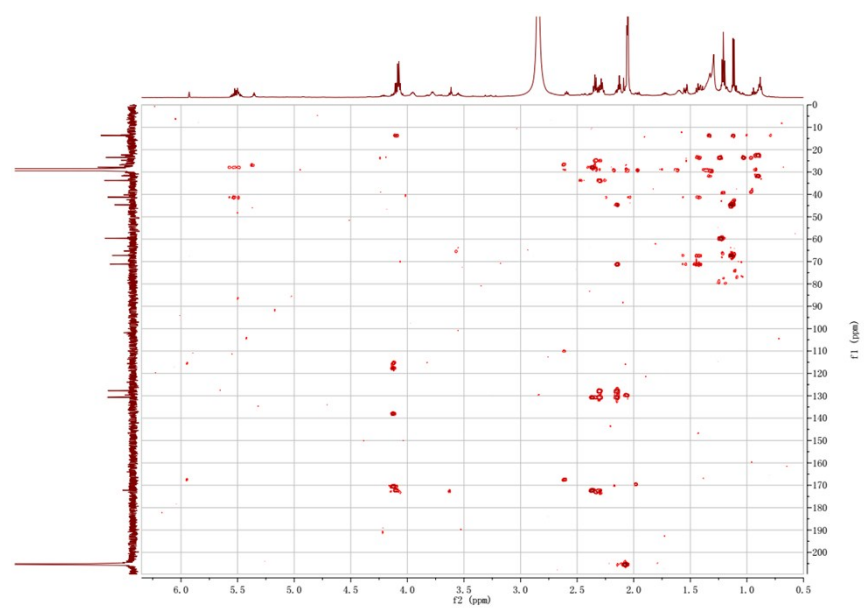

Figure S78. HMBC Spectrum of compound **10** in acetone-d<sub>6</sub>

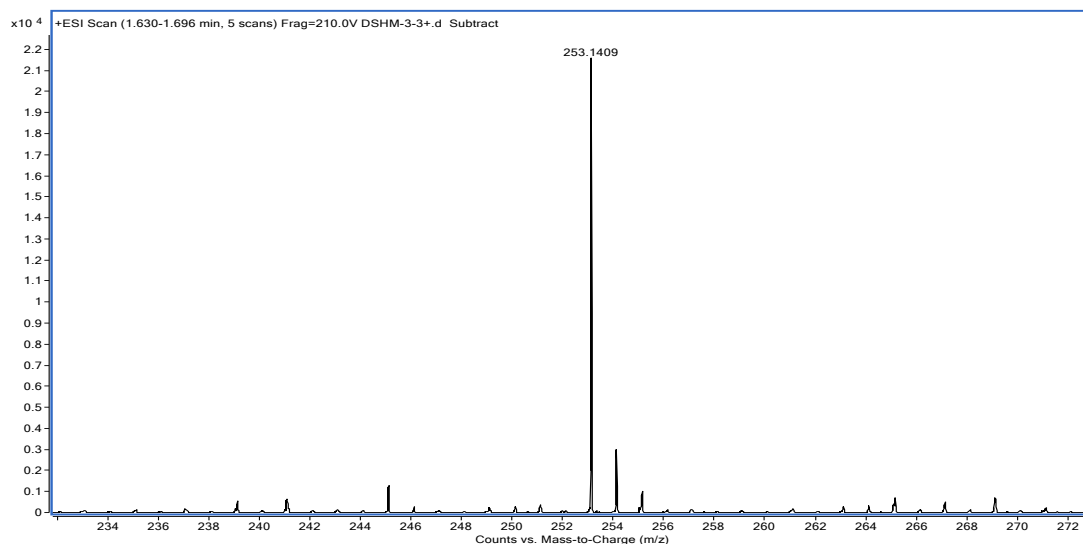

Figure S79. HRESIMS spectrum of compound **10**.

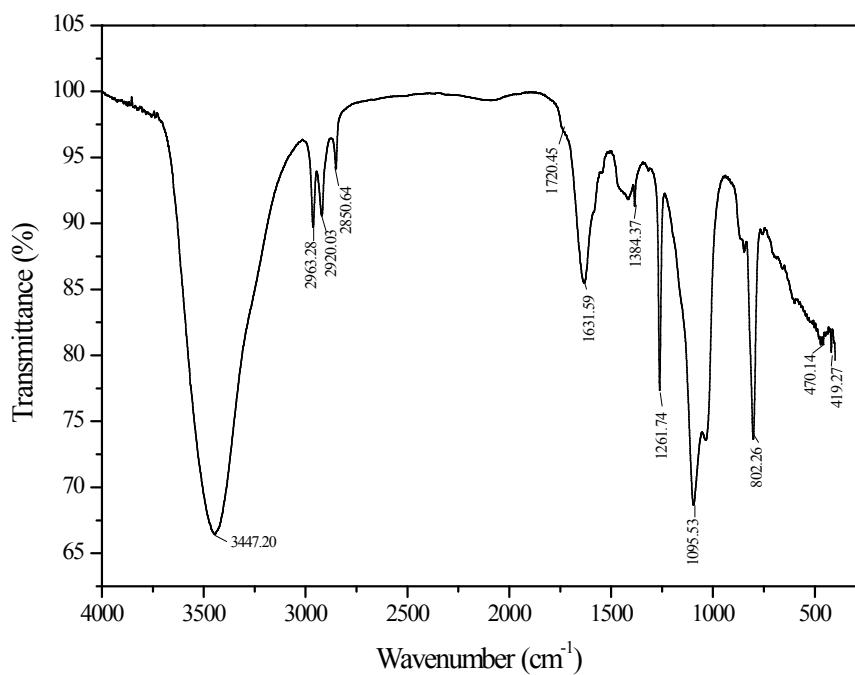

Figure S80. IR Spectrum of compound **10**



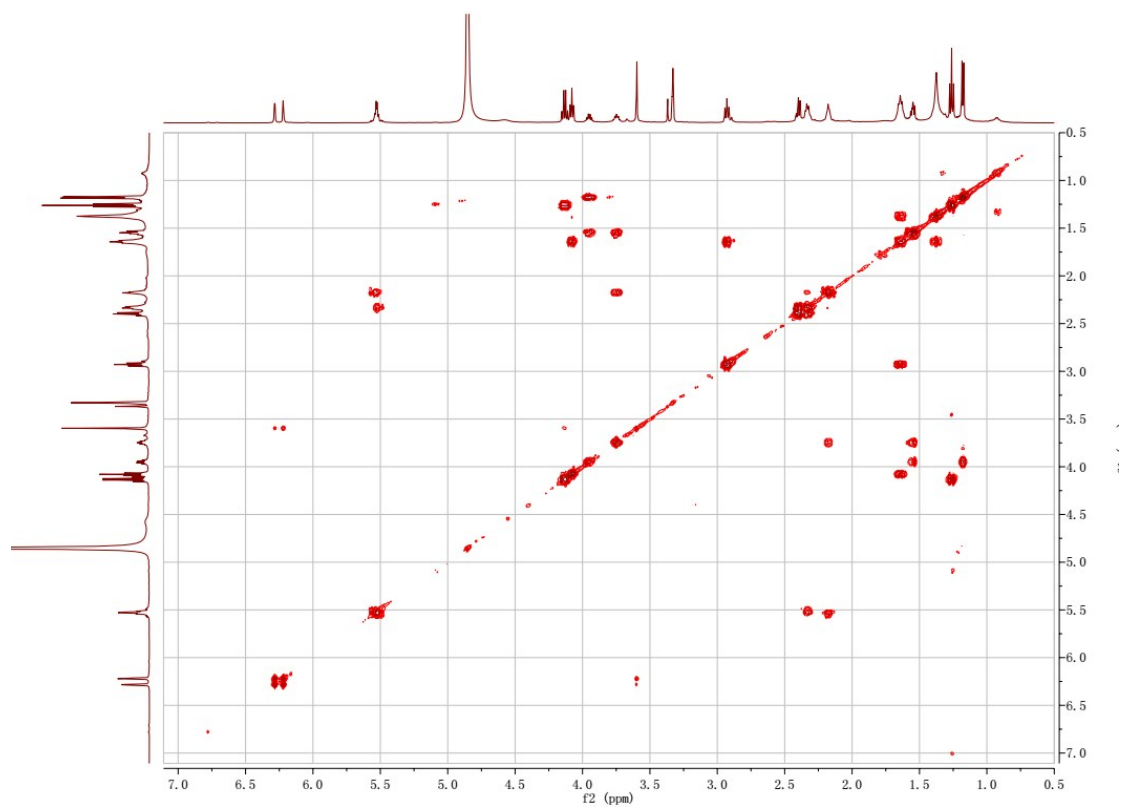

Figure S83.  $^1\text{H}$ - $^1\text{H}$  COSY spectrum of compound **11** in MeOD

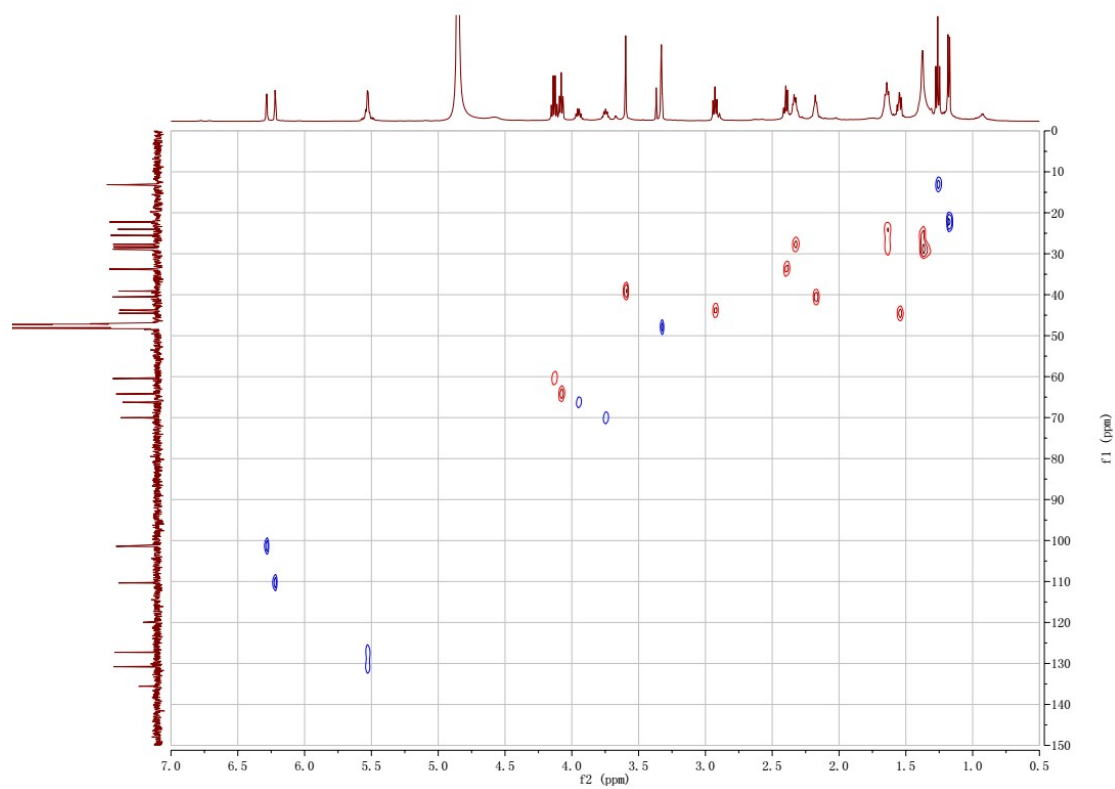

Figure S84. HSQC spectrum of compound **11** in MeOD

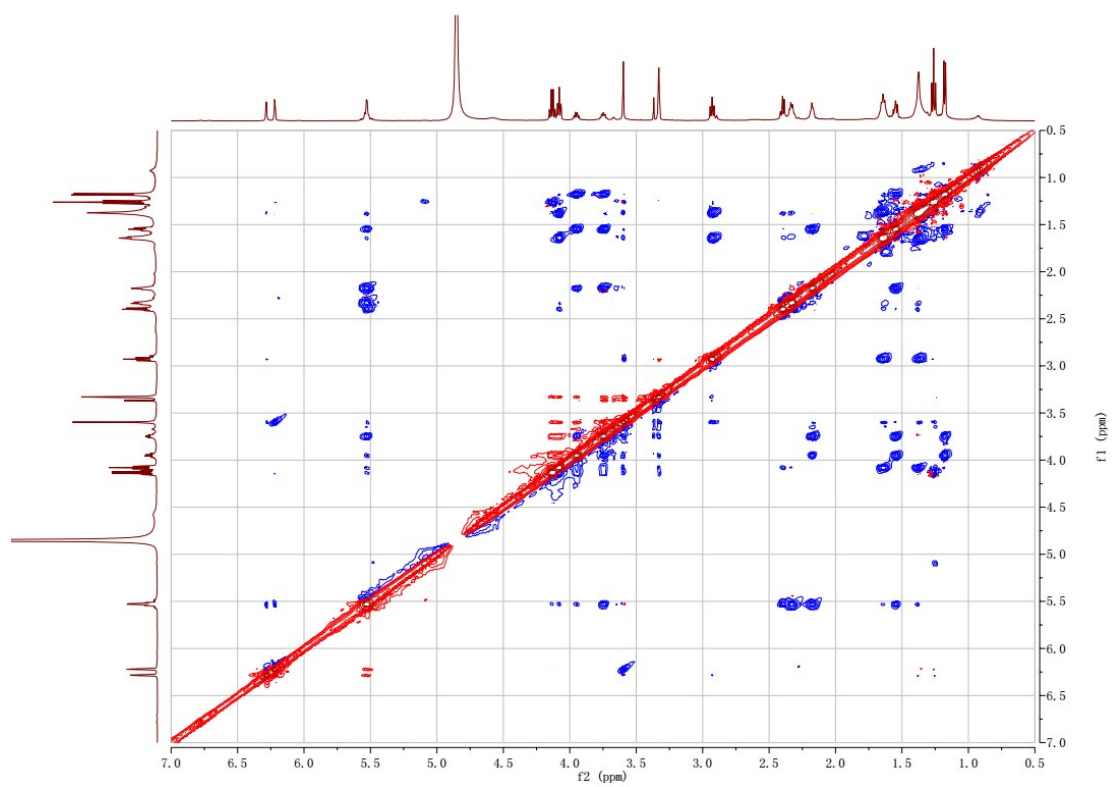

Figure S85. NOESY spectrum of compound **11** in MeOD

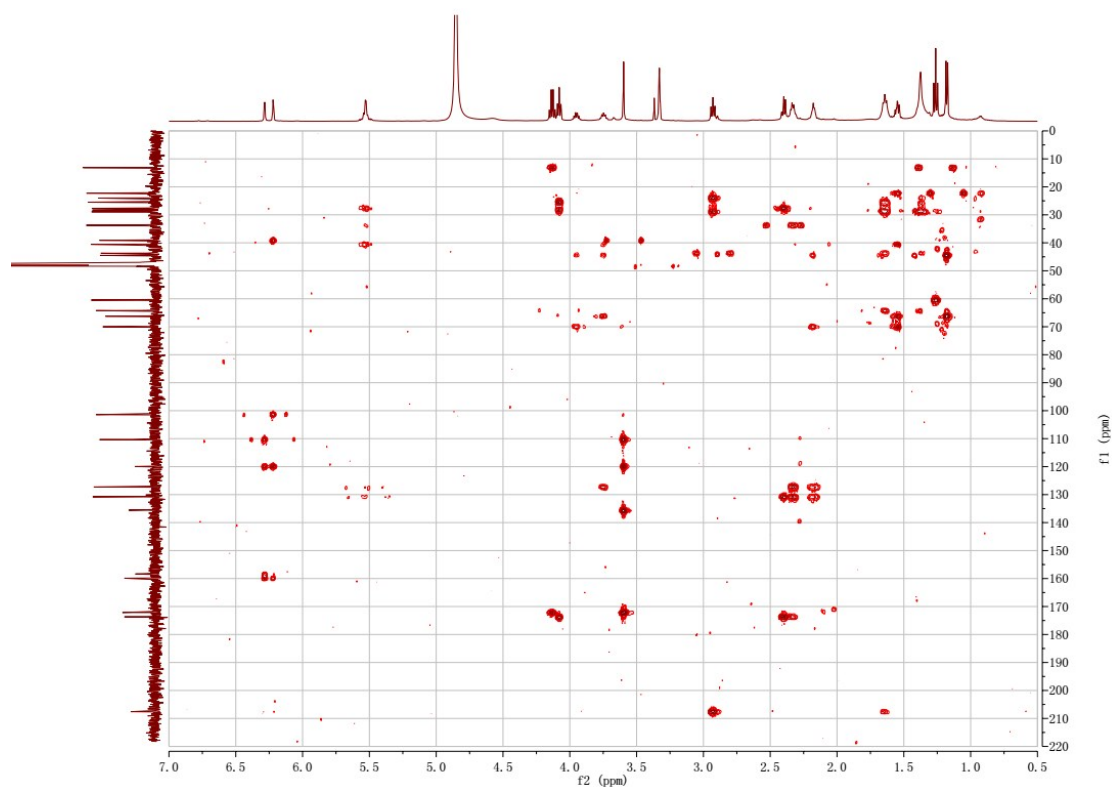

Figure S86. HMBC spectrum of compound **11** in MeOD

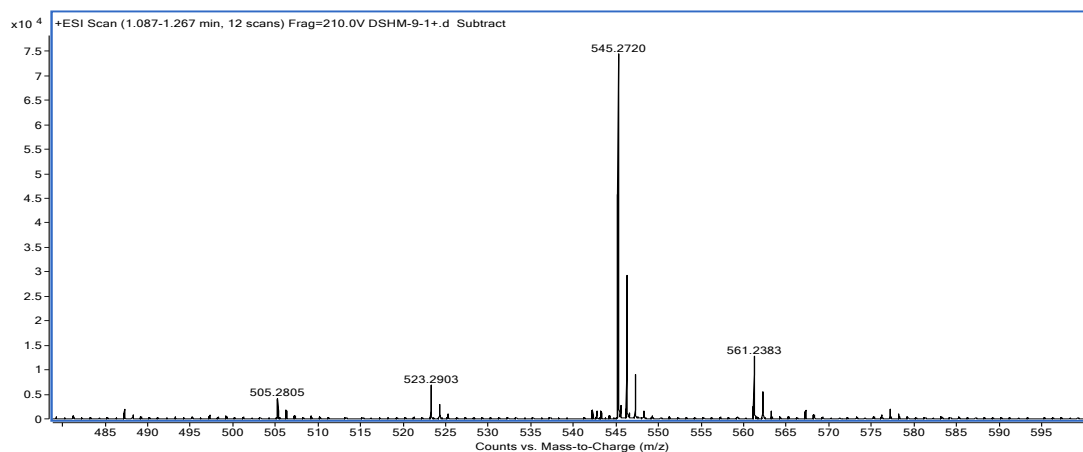

Figure S87. HRESIMS Spectrum of compound **11**

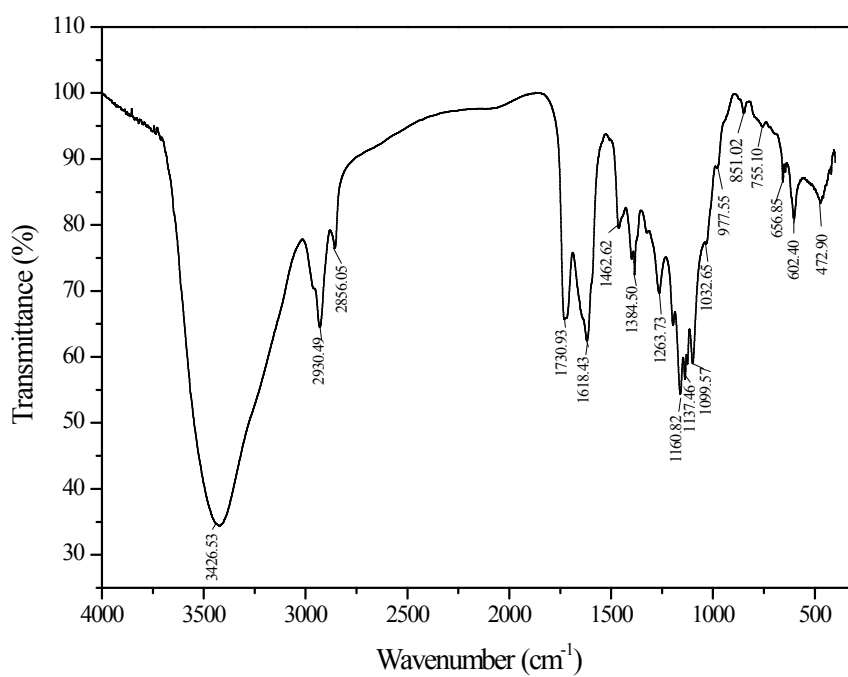

Figure S88. IR Spectrum of compound **11**

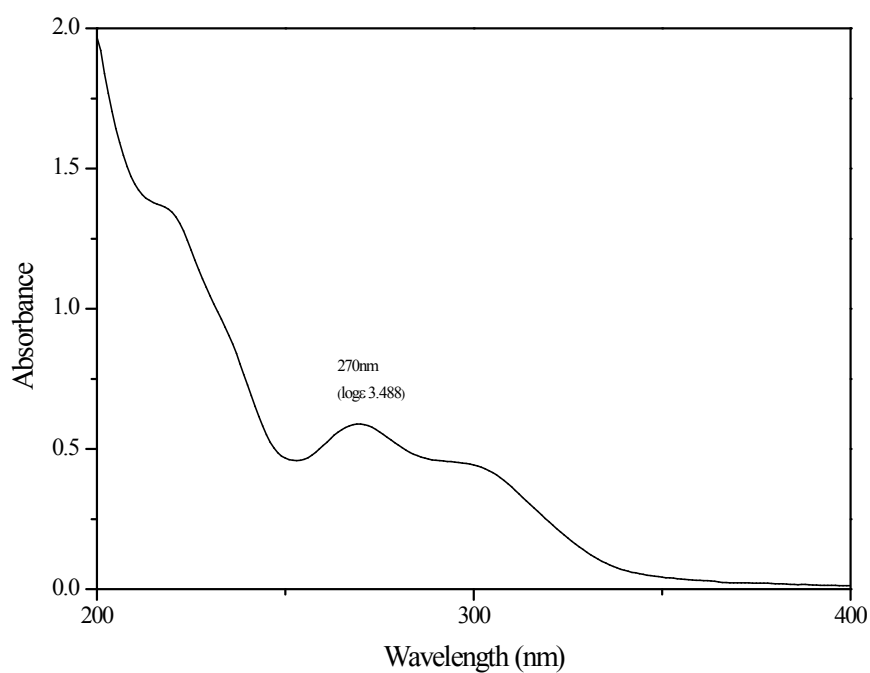

Figure S89. UV Spectrum of compound **11**

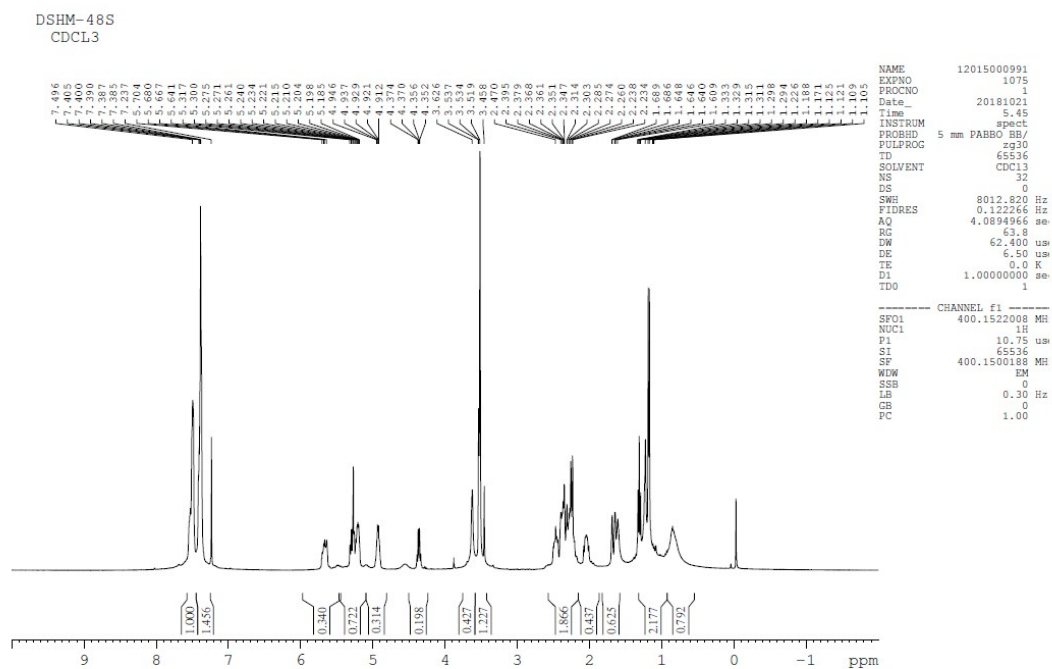

Figure S90 <sup>1</sup>H NMR spectrum of (S)-MTPA ester of **1** in CDCl<sub>3</sub>



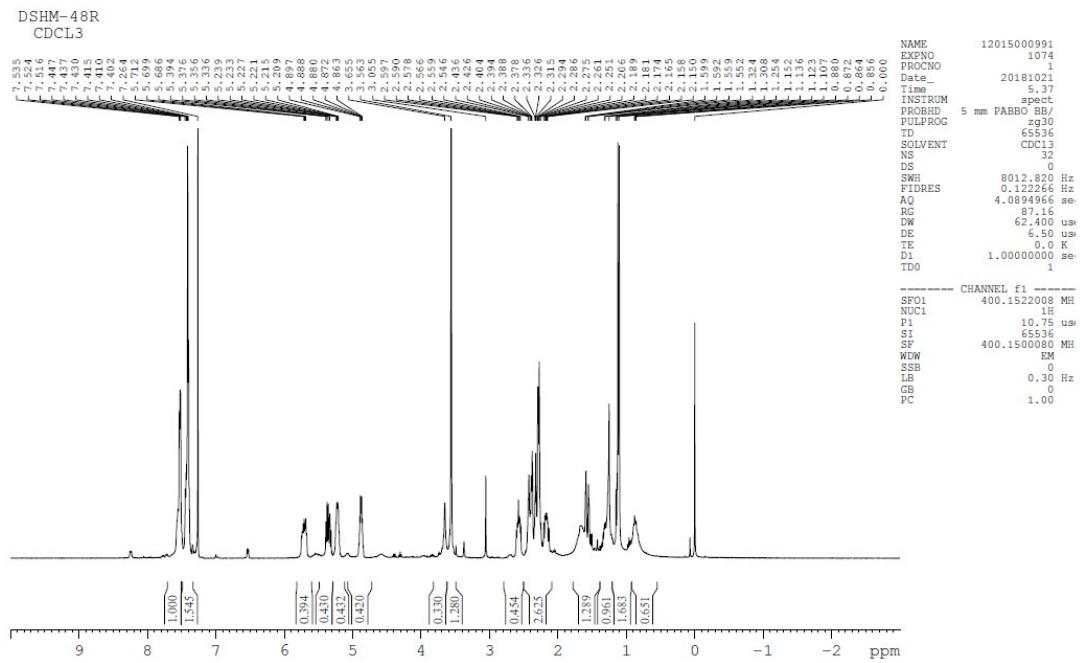

Figure S91 <sup>1</sup>H NMR spectrum of (R)-MTPA ester of **1** in CDCl<sub>3</sub>
